# Supplementary material for: Prevention of tuberculosis in cynomolgus macaques by an attenuated Mycobacterium tuberculosis vaccine candidate
Source: Springer Nature journal article supplement (doi:10.1038/s41467-025-57090-4), 2025-02-25
Supplement: MOESM1 [file 41467_2025_57090_MOESM1_ESM.pdf › 41467_2025_57090_MOESM1_ESM.pdf]

## Supplementary information

### **Prevention of tuberculosis in cynomolgus macaques by an attenuated *Mycobacterium tuberculosis* vaccine candidate**

Dhiraj K. Singh<sup>1</sup>, Mushtaq Ahmed<sup>2</sup>, Sadia Akter<sup>2</sup>, Vinay Shivanna<sup>1</sup>, Allison N. Bucşan<sup>3</sup>, Abhishek Mishra<sup>4</sup>, Nadia A. Golden<sup>3</sup>, Peter J. Didier<sup>3</sup>, Lara A. Doyle<sup>3</sup>, Shannan Hall-Ursone<sup>1</sup>, Chad J. Roy<sup>3</sup>, Garima Arora<sup>1</sup>, Edward Dick Jr<sup>1</sup>, Chinnaswamy Jagannath<sup>4</sup>, Smriti Mehra<sup>1,3</sup>, Shabaana A. Khader<sup>2\*</sup>, Deepak Kaushal<sup>1\*</sup>

\*Correspondence authors. Email: [dkaushal@txbiomed.org](mailto:dkaushal@txbiomed.org); [khader@uchicago.edu](mailto:khader@uchicago.edu).

#### **This PDF file includes:**

Supplementary Figures and legends:

- Figure S1
- Figure S2
- Figure S3
- Figure S4
- Figure S5
- Figure S6
- Figure S7
- Figure S8
- Figure S9
- Figure S10

Supplementary Tables and legends:

- Supplementary Table 1
- Supplementary Table 2
- Supplementary Table 3
- Supplementary Table 4

## Supplementary figures

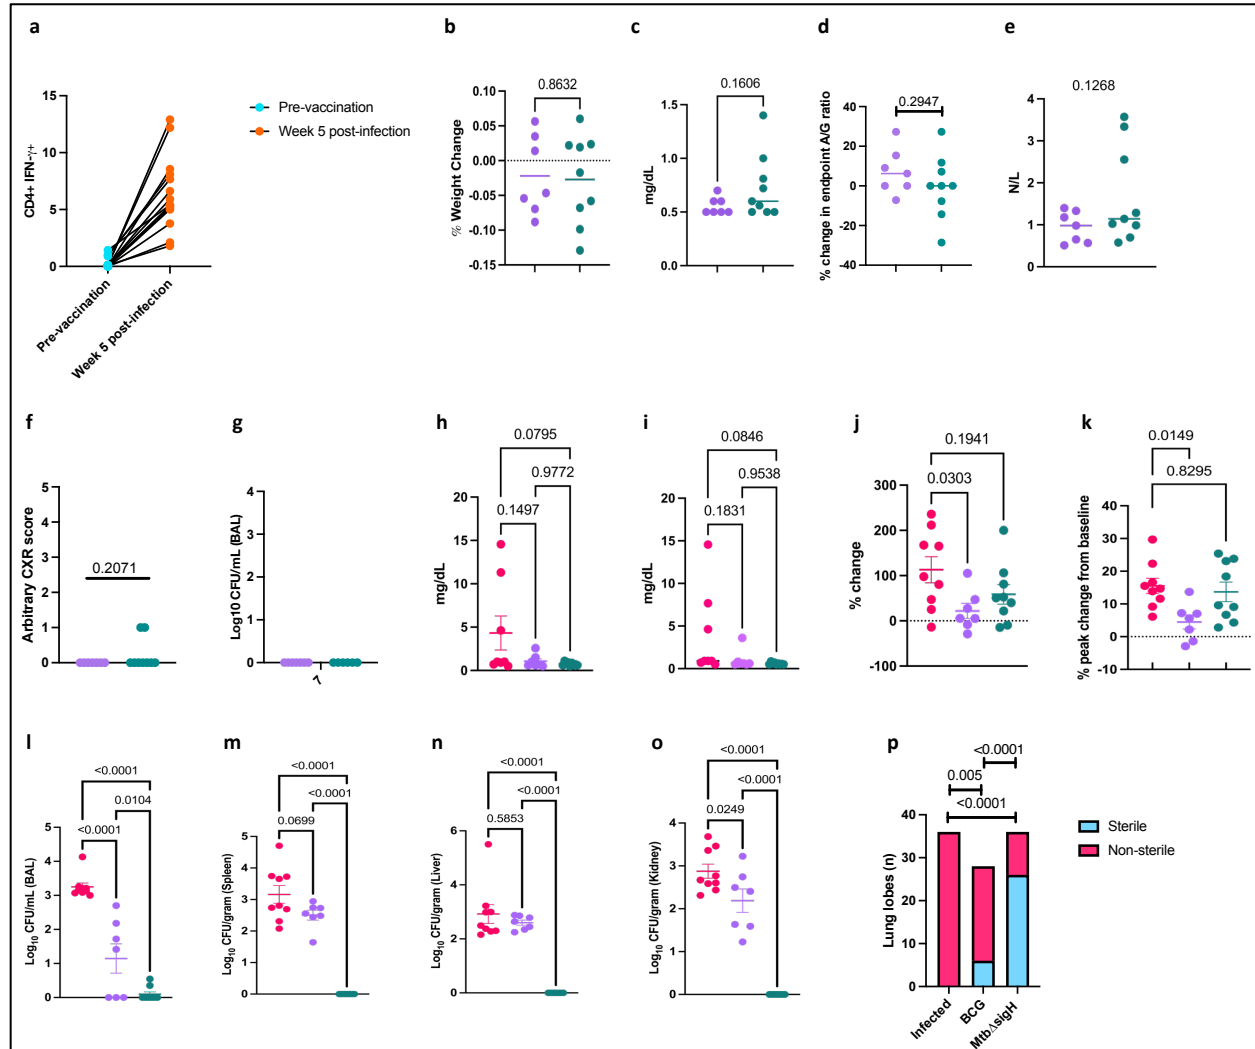

**Figure S1. Clinical, microbiological and pathological measures post-vaccination and challenge.** **a.** Antigen-specific intracellular cytokine staining pre-vaccination (turquoise) and post-challenge (orange) to measure IFNG production to confirm and validate Tuberculin Skin Test (TST) results, following stimulation with *Mtb* cell wall fraction (CW) (BEI Resources). **b.** % change in body weight at the end of the vaccination phase in BCG (lavender) and  $\Delta sigH$ -vaccinated (teal) groups relative to pre-vaccination baseline. **c.** Peak serum C-reactive protein (CRP) values (mg/dL) during the vaccination phase in BCG- and  $\Delta sigH$ -vaccinated groups. **d.** % change in serum A/G ratios at the end of the vaccination phase relative to pre-vaccination

baseline in BCG- and  $\Delta sigH$ - vaccinated groups. **e.** N/L ratio is peripheral blood at the end of the vaccination phase in BCG- and  $\Delta sigH$ - vaccinated groups. **f.** CXR scores at the end of the vaccination phase in BCG- and  $\Delta sigH$ - vaccinated groups. **g.** BAL CFUs at the end of the vaccination phase in BCG- and  $\Delta sigH$ - vaccinated groups. **h** (peak) and **i** (endpoint) serum CRP values (mg/dL) in unvaccinated (**strawberry**), BCG (**lavender**) and  $\Delta sigH$ -vaccinated (**teal**) groups during the *Mtb* challenge phase. Changes in blood neutrophil (N) percentage (**j**) and numbers (**k**) in unvaccinated, BCG- and  $\Delta sigH$ - vaccinated groups at necropsy. (**l**). BAL CFUs (at the endpoint) in unvaccinated, BCG- and  $\Delta sigH$ - vaccinated groups. CFUs in spleen (**m**), liver (**n**) and kidneys (**o**) (per gram tissue) in unvaccinated, BCG- and  $\Delta sigH$ - vaccinated groups at necropsy. (**p**) Fisher's exact test comparing sterile (**strawberry**) vs nonsterile (**turquoise**) lung lobes in the three groups of macaques. Data is presented as mean  $\pm$  SEM and P-values are derived from multiple Mann-Whitney tests with multiple hypothesis correction by false discovery rate method of Benjamini, Kreiger and Yekutielli (two stage step up) (**b-g**) except for **h-o** where one-way ANOVA with Tukey's correction was used.

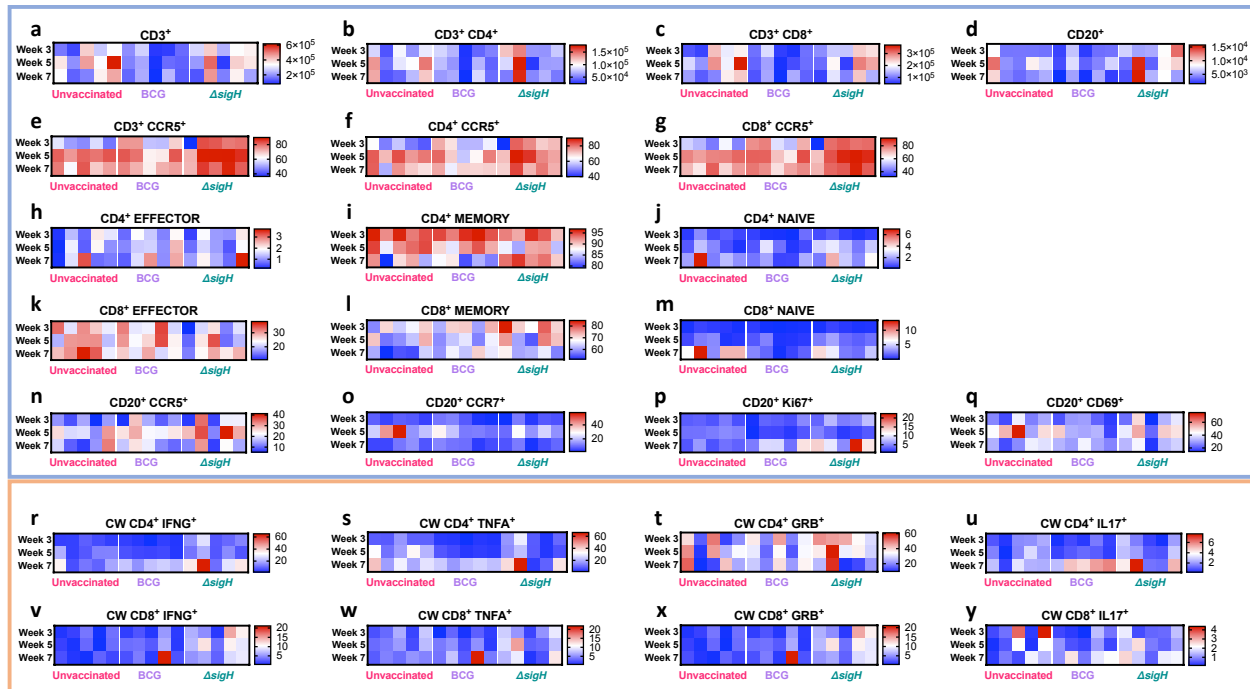

**Figure S2. Lymphocytic immune responses in BAL post-infection.** In three groups of CMs, shown are the absolute counts of CD3<sup>+</sup> (a), CD4<sup>+</sup> (b), and CD8<sup>+</sup> (c) T cells and B cells (d), in BAL at weeks 3, 5, and 7 post-infection time-point. Shown are the frequencies of CD3<sup>+</sup>CCR5<sup>+</sup> (e), CD4<sup>+</sup>CCR5<sup>+</sup> (f), and CD8<sup>+</sup>CCR5<sup>+</sup> (g) T cells in BAL, expressed as percentage of parental populations. Frequencies of CD4<sup>+</sup> T cells (CD28<sup>-</sup>CD95<sup>+</sup>) effector (h), (CD28<sup>+</sup>CD95<sup>+</sup>) memory (i) and naïve (CD28<sup>+</sup>CD95<sup>-</sup>) (j), CD8<sup>+</sup> T cells (CD28<sup>-</sup>CD95<sup>+</sup>) effector (k), (CD28<sup>+</sup>CD95<sup>+</sup>) memory (l) and naïve (CD28<sup>+</sup>CD95<sup>-</sup>) (m) in BAL at weeks 3, 5, and 7 post-infection time-point are depicted as percentage of parental population. Shown are the frequencies of CD20<sup>+</sup>CCR5<sup>+</sup> (n), CD20<sup>+</sup>CCR7<sup>+</sup> (o), CD20<sup>+</sup>KI67<sup>+</sup> (p) and CD20<sup>+</sup>CD69<sup>+</sup> (q) B cells in BAL at weeks 3, 5, and 7 post-infection time-point, expressed as percentage of B cell population. Frequencies of CD4<sup>+</sup> and CD8<sup>+</sup> T cells expressing IFNG (r, v), TNFA (s, w), GRB (t, x) and IL17 (u, y) in response to *Mtb* Cell-Wall (CW) fraction in BAL at weeks 3, 5, and 7 post-infection time-point are depicted as percentage of parental population. Each column represents an individual macaque. Results are shown for n=5 macaques per group.



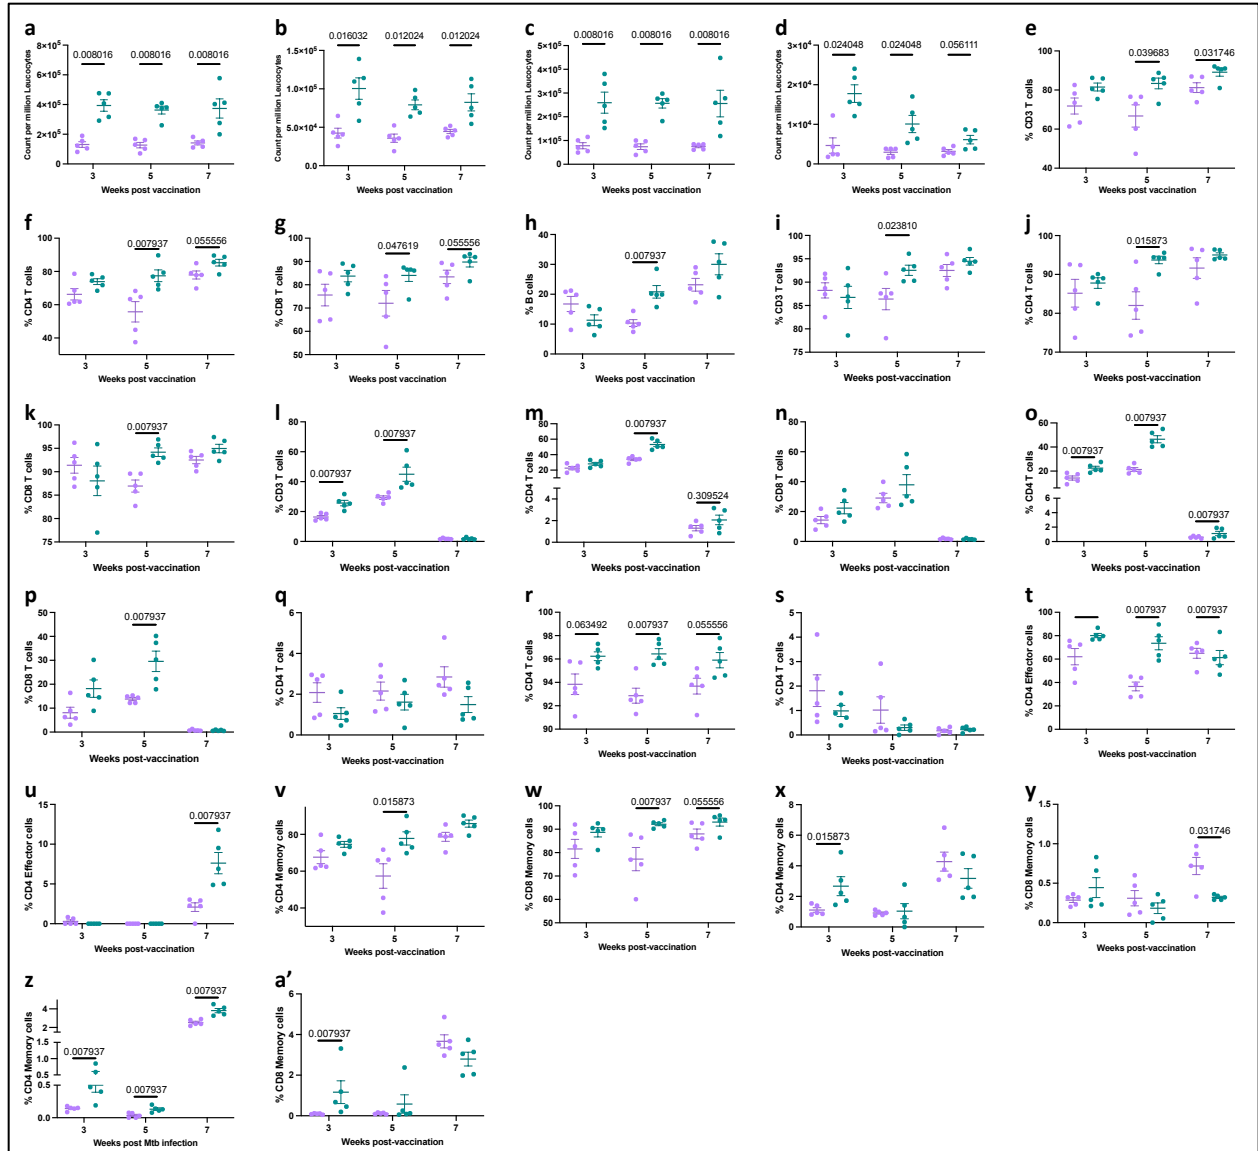

**Figure S3. T cell dynamics in the BAL post-vaccination.** Frequencies of (a) CD3<sup>+</sup>, (b) CD4<sup>+</sup>, (c) CD8<sup>+</sup>, (d) CD20<sup>+</sup>, (e) CD3<sup>+</sup>CCR5<sup>+</sup>, (f) CD4<sup>+</sup>CCR5<sup>+</sup>, (g) CD8<sup>+</sup>CCR5<sup>+</sup>, (h) CD20<sup>+</sup>CCR5<sup>+</sup>, (i) CD3<sup>+</sup>CXCR3<sup>+</sup>, (j) CD4<sup>+</sup>CXCR3<sup>+</sup>, (k) CD8<sup>+</sup>CXCR3<sup>+</sup>, (l) CD3<sup>+</sup>CCR6<sup>+</sup>, (m) CD4<sup>+</sup>CCR6<sup>+</sup>, (n) CD8<sup>+</sup>CCR6<sup>+</sup>, (o) CD4<sup>+</sup>CXCR3<sup>+</sup>CCR6<sup>+</sup>, (p) CD8<sup>+</sup>CXCR3<sup>+</sup>CCR6<sup>+</sup>, (q) CD4<sup>+</sup> Effector (CD95<sup>+</sup>CD28<sup>-</sup>), (r) CD4<sup>+</sup> memory (CD95<sup>+</sup>CD28<sup>+</sup>), (s) CD4<sup>+</sup> naïve (CD95<sup>-</sup>CD28<sup>+</sup>), (t) Effector CD4<sup>+</sup>CD69<sup>+</sup> and (u) KI67<sup>+</sup>, (v) Memory CD4<sup>+</sup>CCR5<sup>+</sup>, (w) Memory CD8<sup>+</sup>CCR5<sup>+</sup>, (x) Memory CD4<sup>+</sup>CCR7<sup>+</sup>, (y) Memory CD4<sup>+</sup>CCR5<sup>+</sup>, (z) Memory CD4<sup>+</sup>KI67<sup>+</sup>, (a') Memory CD8<sup>+</sup> KI67<sup>+</sup>,

relative to parental populations. Data is presented as mean  $\pm$  SEM and P-values were calculated by two-way ANOVA with Tukey's correction. Results are shown for n=5 macaques per group.

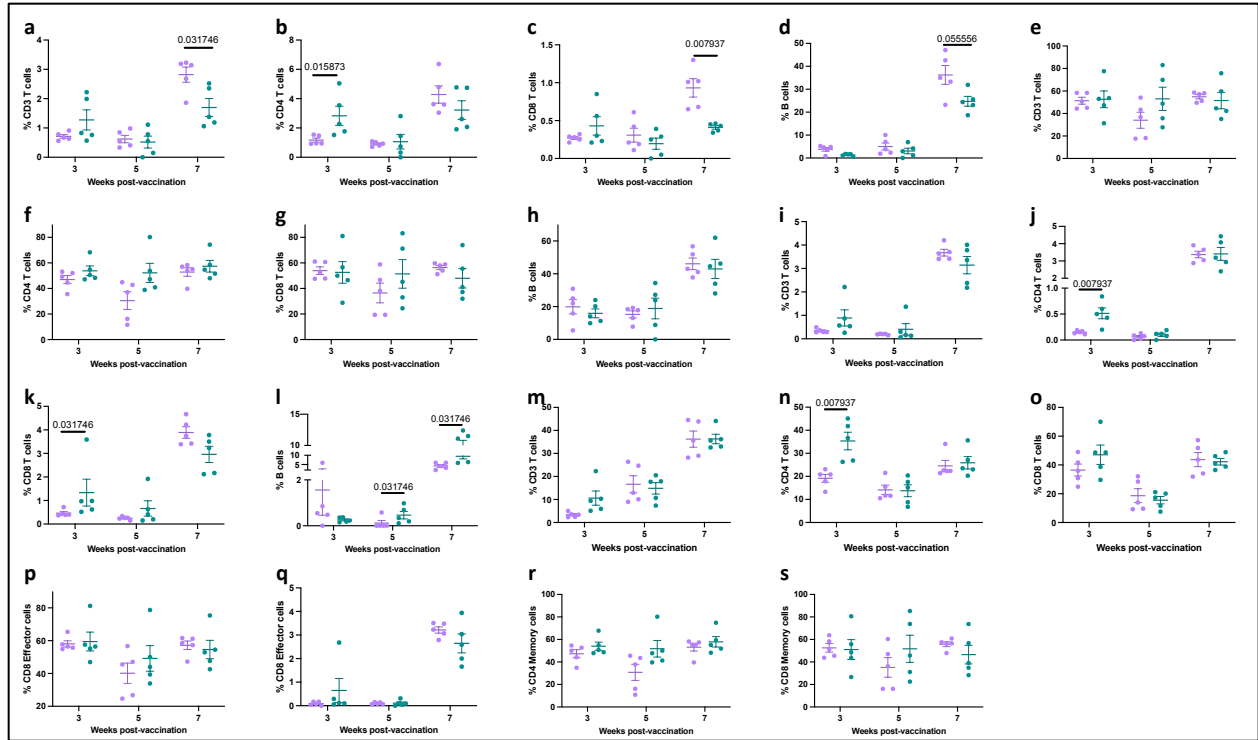

**Figure S4. T cell responses in the BAL of macaques at 3-, 5- and 7-weeks post vaccination.**

Frequencies of **a.** CD3<sup>+</sup> CCR7<sup>+</sup>. **b.** CD4<sup>+</sup> CCR7<sup>+</sup>. **c.** CD8<sup>+</sup> CCR7<sup>+</sup>. **d.** CD20<sup>+</sup> CCR7<sup>+</sup>. **e.** CD3<sup>+</sup> CD69<sup>+</sup>. **f.** CD4<sup>+</sup> CD69<sup>+</sup>. **g.** CD8<sup>+</sup> CD69<sup>+</sup>. **h.** CD20<sup>+</sup> CD69<sup>+</sup>. **i.** CD3<sup>+</sup> KI67<sup>+</sup>. **j.** CD4<sup>+</sup> KI67<sup>+</sup>. **k.** CD8<sup>+</sup> KI67<sup>+</sup>. **l.** CD20<sup>+</sup> KI67<sup>+</sup>. **m.** CD3<sup>+</sup> HLA-DR<sup>+</sup>. **n.** CD4<sup>+</sup> HLA-DR<sup>+</sup>. **o.** CD8<sup>+</sup> HLA-DR<sup>+</sup>. **p.** Effector CD8<sup>+</sup> CD69<sup>+</sup>. **q.** Effector CD8<sup>+</sup> KI67<sup>+</sup>, **r.** Memory CD4<sup>+</sup> CD69<sup>+</sup> **s.** Memory CD8<sup>+</sup> CD69<sup>+</sup>, relative to parental populations. Data is presented as mean  $\pm$  SEM and P-values are derived from multiple Mann-Whitney tests with multiple hypothesis correction by false discovery rate method of Benjamini, Kreiger and Yekutielli (two stage step up).

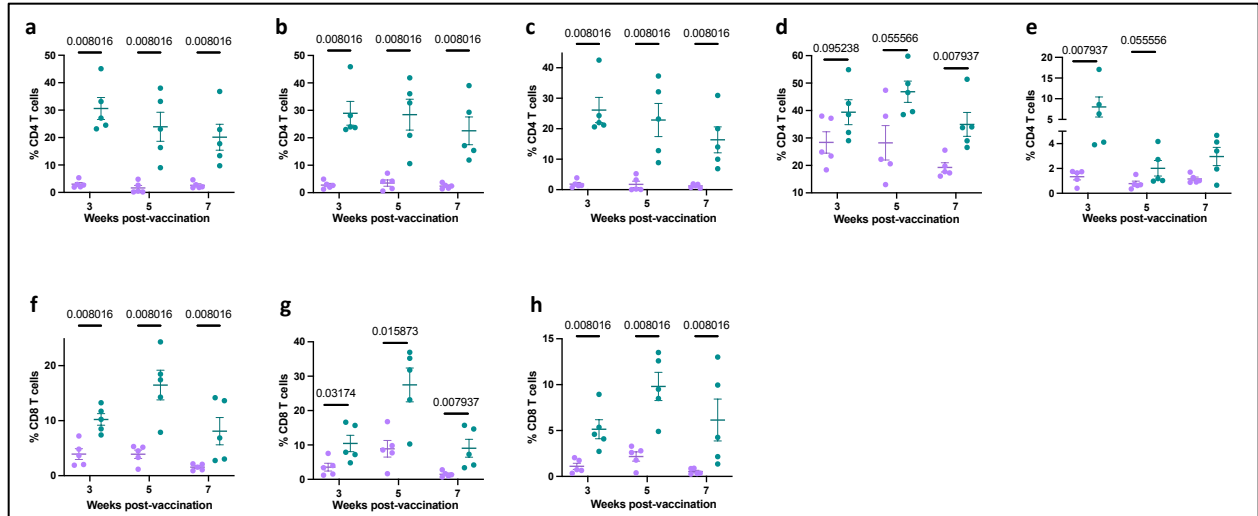

**Figure S5. *Mtb* cell wall fraction specific T cell responses in the BAL post-vaccination.**

Frequencies of **a.** CD4<sup>+</sup>IFNG<sup>+</sup>. **b.** CD3<sup>+</sup> TNFA<sup>+</sup>. **c.** CD4<sup>+</sup> IFNG<sup>+</sup>TNFA<sup>+</sup>. **d.** CD4<sup>+</sup> GZMB<sup>+</sup>. **e.** CD4<sup>+</sup> IL17<sup>+</sup>. **f.** CD8<sup>+</sup>IFNG<sup>+</sup>. **g.** CD8<sup>+</sup> TNFA<sup>+</sup>. **h.** CD8<sup>+</sup> IFNG<sup>+</sup>TNFA<sup>+</sup> in response to *Mtb* cell wall fraction (CW). P-values are derived from multiple Mann-Whitney tests with multiple hypothesis correction by false discovery rate method of Benjamini, Kreiger and Yekutielli (two stage step up). Results are shown for n=5 macaques per group.

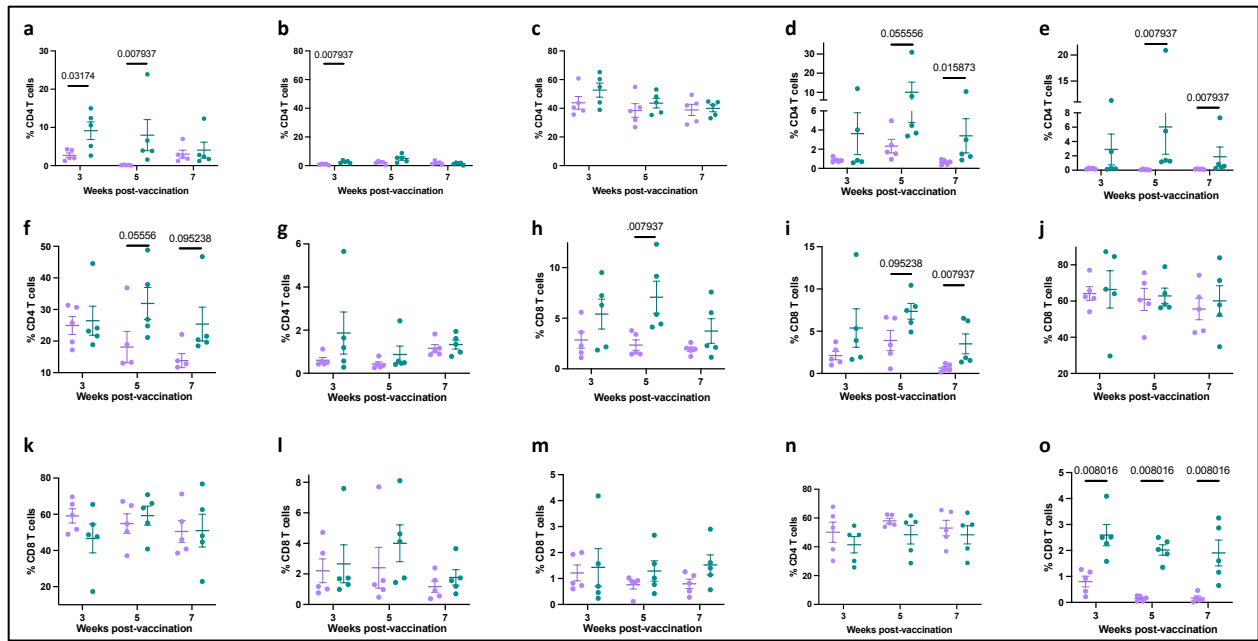

**Figure S6. *Mtb* ESAT6 and CFP10 (EC) specific T cell responses in the BAL post-vaccination.** **a.** Frequencies of CD4<sup>+</sup>IFNG<sup>+</sup> in response to EC compared to **b.** unstimulated (negative) and **c.** PMA/Ionomycin stimulated (positive control). Frequencies of **d.** CD4<sup>+</sup> TNFA<sup>+</sup>. **e.** CD4<sup>+</sup> IFNG<sup>+</sup> TNFA<sup>+</sup>. **f.** CD4<sup>+</sup> GZMB<sup>+</sup>. **g.** CD4<sup>+</sup>IL17<sup>+</sup>. **h.** CD8<sup>+</sup>IFNG<sup>+</sup>. **i.** CD8<sup>+</sup>TNFA<sup>+</sup> in response to EC. **j.** CD8<sup>+</sup>GZMB<sup>+</sup> in response to CW. **k.** CD8<sup>+</sup>GZMB<sup>+</sup> in response to EC. **l.** CD8<sup>+</sup>IL17<sup>+</sup> in response to CW. **m.** CD8<sup>+</sup>IL17<sup>+</sup> in response to EC. **n.** CD8<sup>+</sup>GZMB<sup>+</sup> unstimulated control. **o.** CD8<sup>+</sup>IFNG<sup>+</sup> TNFA<sup>+</sup> in response to EC. Data is presented as mean  $\pm$  SEM and P-values are derived from multiple Mann-Whitney tests with multiple hypothesis correction by false discovery rate method of Benjamini, Kreiger and Yekutielli (two stage step up). Results are shown for n=5 macaques per group.

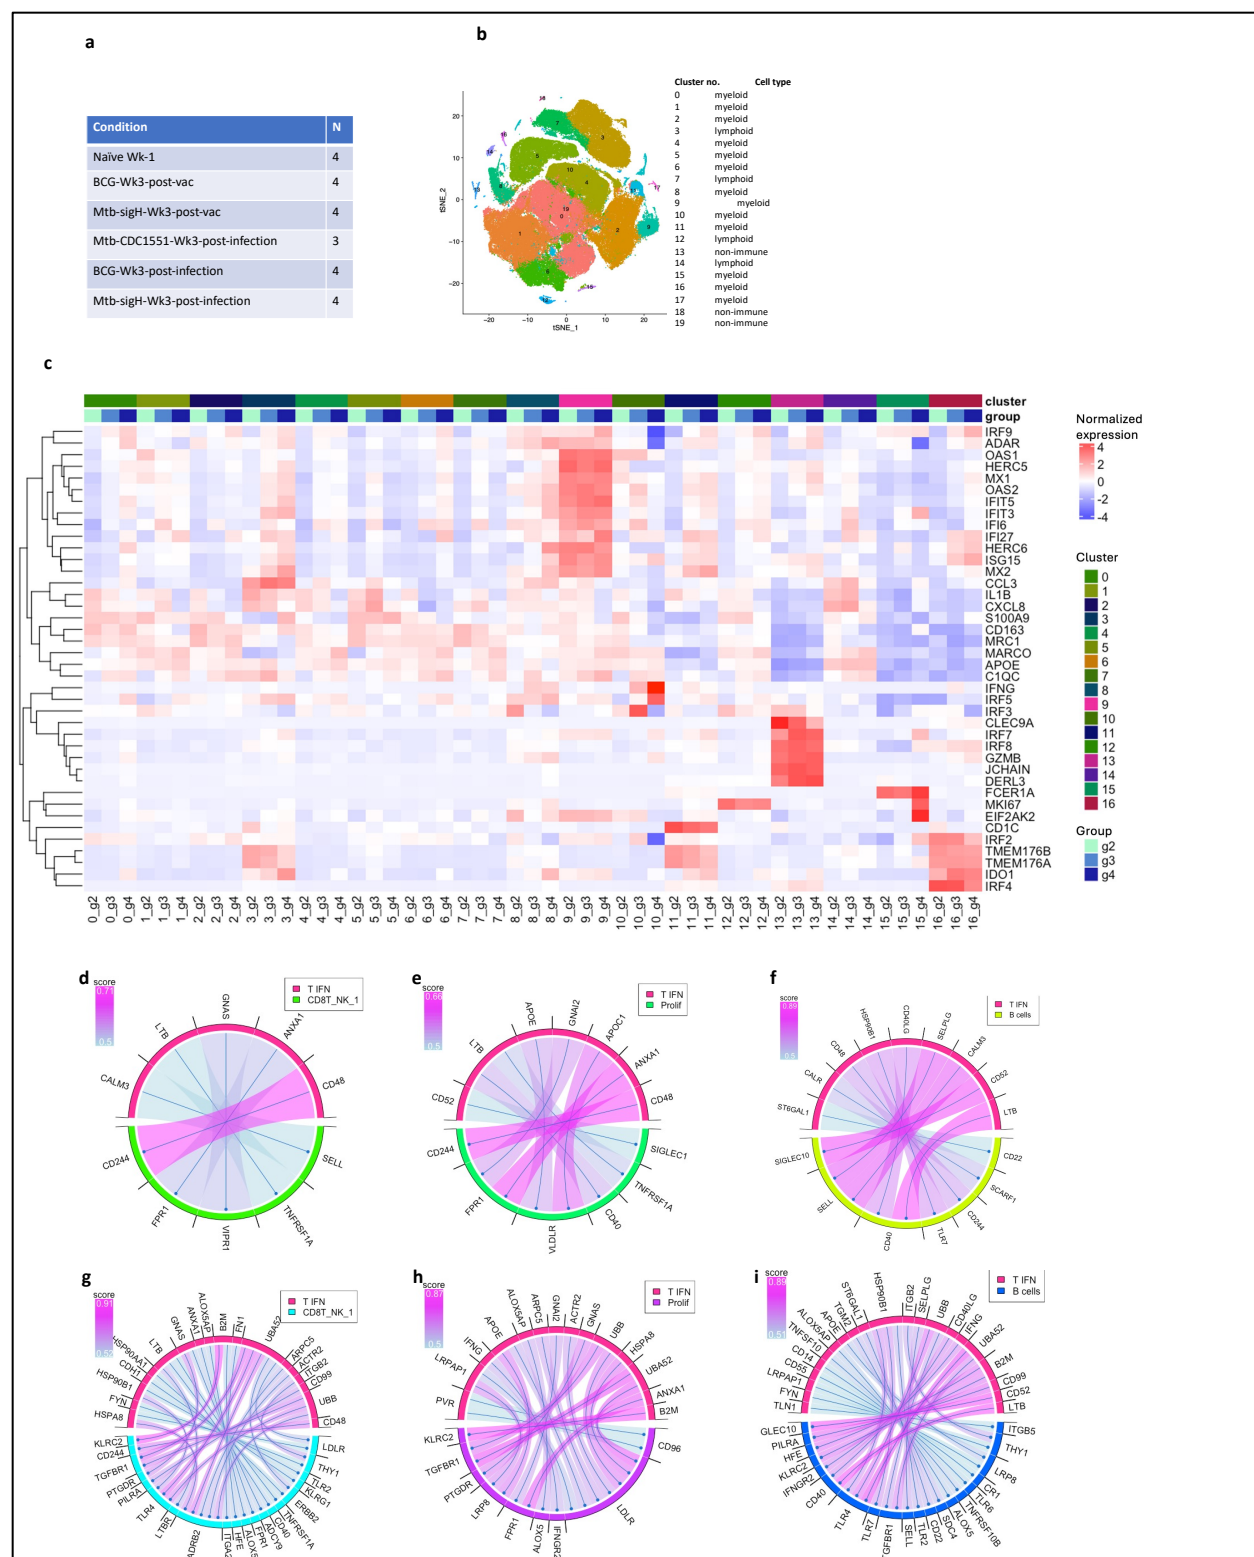

**Figure S7. scRNAseq of BAL cells.** a. scRNAseq design. b. tSNE visualization of major cell types (all conditions together). c. Expression of ISG genes detected across myeloid clusters in

the two vaccination and the unvaccinated/*Mtb* challenged groups. **d-i**. Circos plots depicting ligand-receptor interactions between genes of C9 vs C2 for BCG-vaccinated *Mtb* challenged (**d**) and  $\Delta sigH$ -vaccinated/*Mtb* challenged (**g**), C9 vs C6 for BCG-vaccinated/*Mtb* challenged (**e**) and  $\Delta sigH$ -vaccinated/*Mtb* challenged (**h**), C9 vs C7 and for BCG-vaccinated/*Mtb* challenged (**f**) and  $\Delta sigH$ -vaccinated/*Mtb* challenged (**i**).

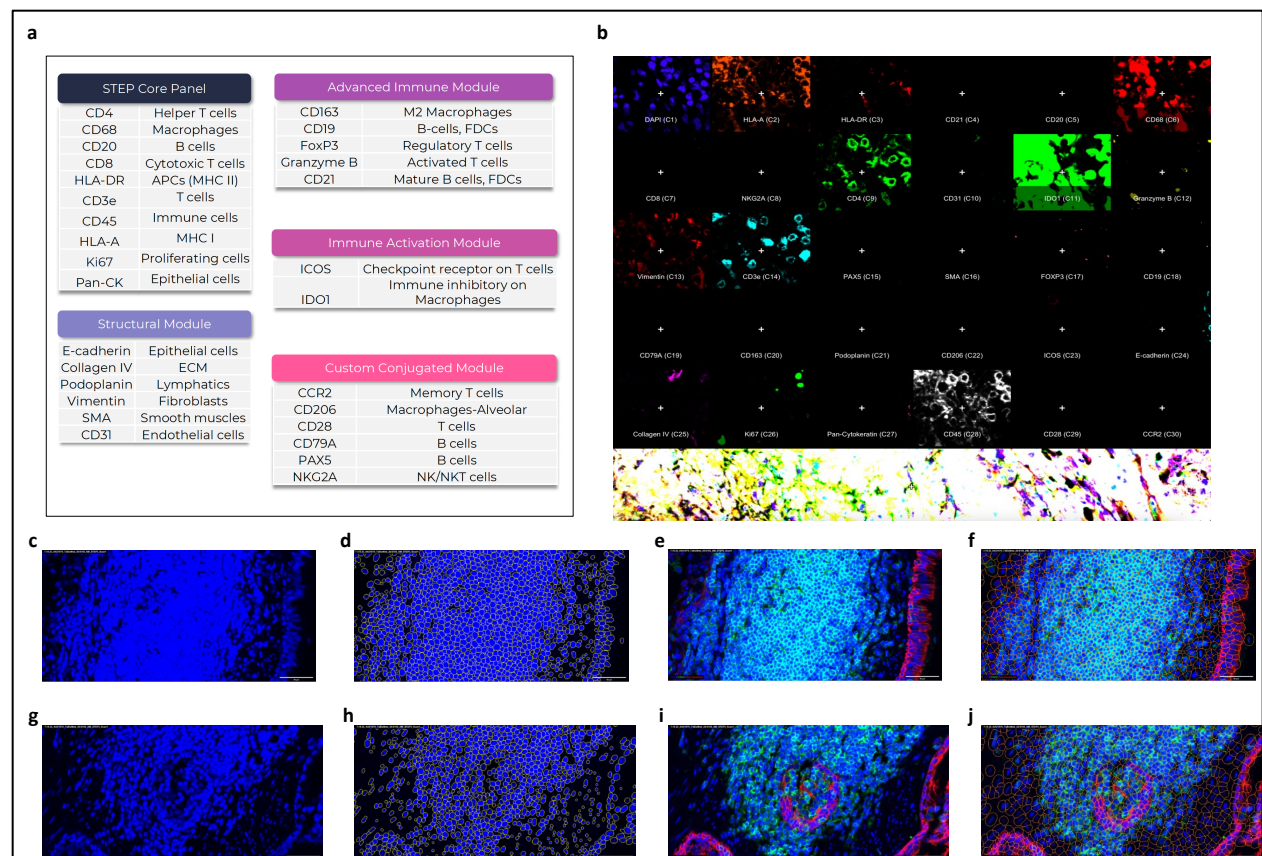

**Figure S8. Spatial multiplexed imaging and segmentation.** **a.** CyCIF panel design. **b.** antibody staining collagen. **c-d.** Stardist nuclear segmentation on DAPI signal for the lung section obtained from an unvaccinated macaque. **e-f.** Membrane expansion mask for the lung section obtained from an unvaccinated macaque. **g-h.** Stardist nuclear segmentation on DAPI signal for the lung section obtained from a  $\Delta sigH$ -vaccinated macaque. **i-j.** Membrane expansion mask for the lung section obtained from a  $\Delta sigH$ -vaccinated macaque.



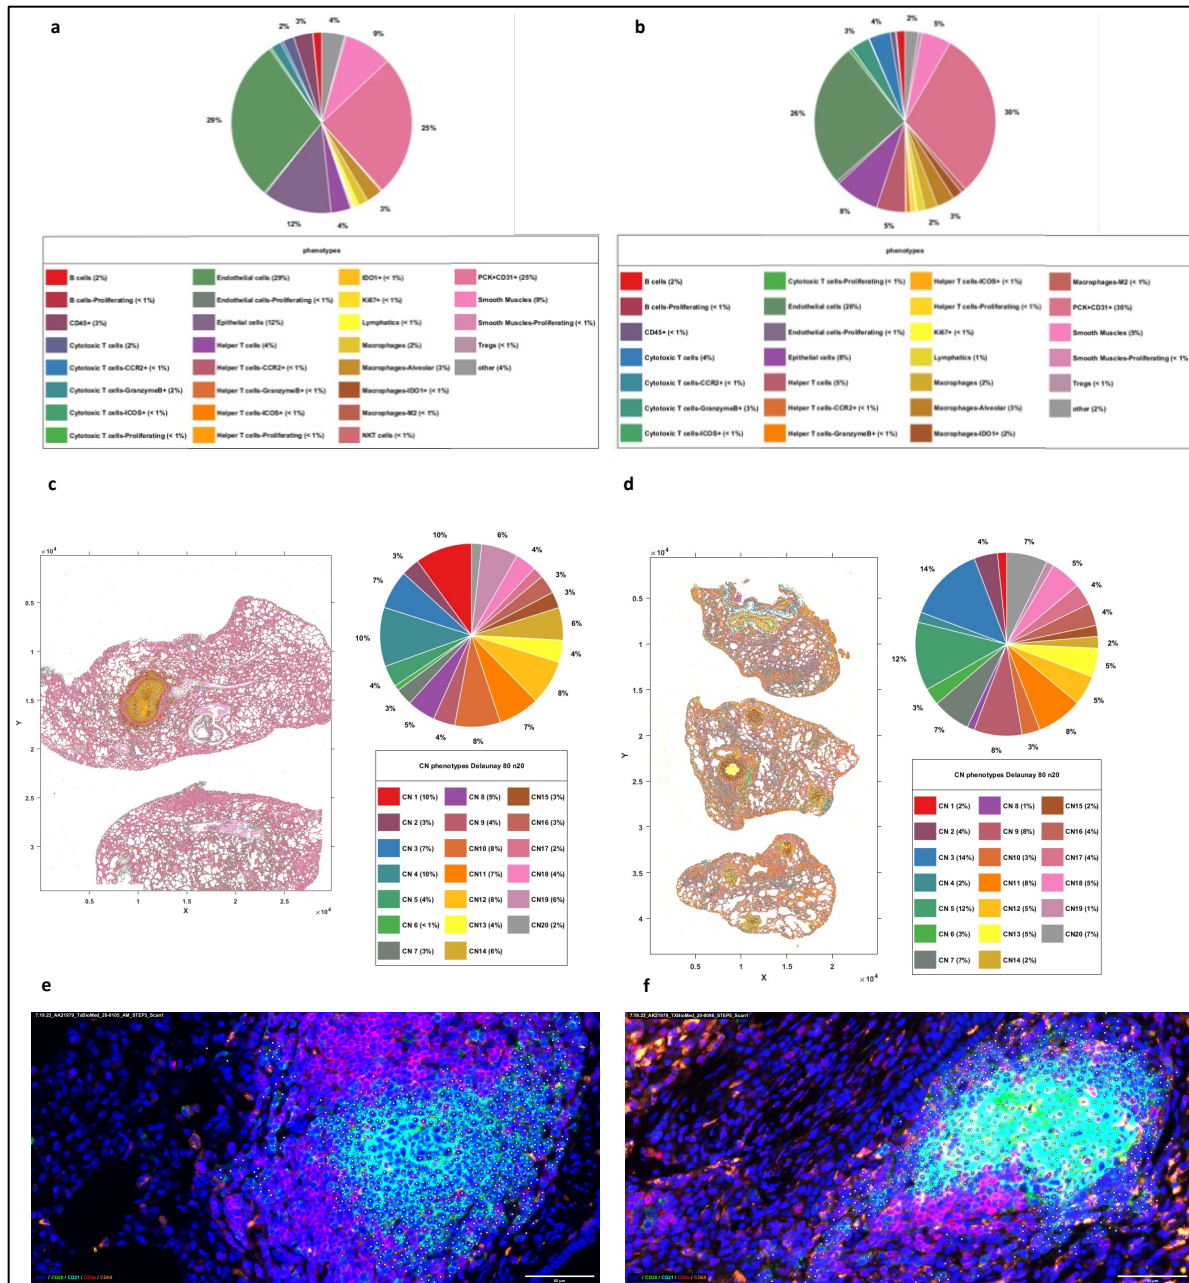

**Figure S9. Cellular subsets identified by spatial multiplexed imaging** Frequency of cellular phenotypes in the lung sections of unvaccinated (a) and  $\Delta sigH$ -vaccinated (b) macaques. Distribution of cellular neighborhoods phenotypes in the lung sections of unvaccinated (c) and  $\Delta sigH$ -vaccinated (d) macaques. Identified B cell rich (iBALT) containing cellular neighborhoods in the lung sections of unvaccinated (e) and  $\Delta sigH$ -vaccinated (f) macaques.



## Supplementary tables

| Supplementary Table 1. Demographics and legends for individual animals used in the study. |                            |                     |        |                    |             |               |            |        |            |
|-------------------------------------------------------------------------------------------|----------------------------|---------------------|--------|--------------------|-------------|---------------|------------|--------|------------|
| Subject                                                                                   | Species                    | Common name         | Gender | Age (Years)        | Weight (kg) | Group         | TST Status | Origin | Study site |
| MF01                                                                                      | <i>Macaca fascicularis</i> | Crab-eating macaque | F      | 11 years, 69 days  | 6.90        | $\Delta$ sigH | Positive   | NIH    | TNPRC      |
| MF02                                                                                      | <i>Macaca fascicularis</i> | Crab-eating macaque | F      | 12 years, 142 days | 4.10        | Unvaccinated  | Positive   | NIH    | TNPRC      |
| MF03                                                                                      | <i>Macaca fascicularis</i> | Crab-eating macaque | F      | 13 years, 211 days | 4.30        | Unvaccinated  | Positive   | NIH    | TNPRC      |
| MF04                                                                                      | <i>Macaca fascicularis</i> | Crab-eating macaque | F      | 10 years, 80 days  | 6.80        | BCG           | Negative   | NIH    | TNPRC      |
| MF05                                                                                      | <i>Macaca fascicularis</i> | Crab-eating macaque | F      | 10 years, 116 days | 5.90        | $\Delta$ sigH | Negative   | NIH    | TNPRC      |
| MF06                                                                                      | <i>Macaca fascicularis</i> | Crab-eating macaque | F      | 10 years, 219 days | 6.20        | $\Delta$ sigH | Positive   | NIH    | TNPRC      |
| MF07                                                                                      | <i>Macaca fascicularis</i> | Crab-eating macaque | F      | 10 years, 200 days | 7.20        | BCG           | Positive   | NIH    | TNPRC      |
| MF08                                                                                      | <i>Macaca fascicularis</i> | Crab-eating macaque | F      | 11 years, 149 days | 7.10        | $\Delta$ sigH | Positive   | NIH    | TNPRC      |
| MF09                                                                                      | <i>Macaca fascicularis</i> | Crab-eating macaque | F      | 11 years, 105 days | 4.70        | Unvaccinated  | Positive   | NIH    | TNPRC      |
| MF10                                                                                      | <i>Macaca fascicularis</i> | Crab-eating macaque | F      | 17 years, 73 days  | 5.50        | Unvaccinated  | Positive   | NIH    | TNPRC      |
| MF11                                                                                      | <i>Macaca fascicularis</i> | Crab-eating macaque | M      | 6 years, 17 days   | 4.95        | BCG           | Positive   | ENVIGO | SNPRC      |
| MF12                                                                                      | <i>Macaca fascicularis</i> | Crab-eating macaque | M      | 5 years, 331 days  | 6.83        | BCG           | Negative   | ENVIGO | SNPRC      |
| MF13                                                                                      | <i>Macaca fascicularis</i> | Crab-eating macaque | M      | 6 years, 20 days   | 6.32        | BCG           | Negative   | ENVIGO | SNPRC      |
| MF14                                                                                      | <i>Macaca fascicularis</i> | Crab-eating macaque | M      | 6 years, 21 days   | 8.35        | BCG           | Negative   | ENVIGO | SNPRC      |
| MF15                                                                                      | <i>Macaca fascicularis</i> | Crab-eating macaque | M      | 6 years, 21 days   | 4.66        | $\Delta$ sigH | Positive   | ENVIGO | SNPRC      |
| MF16                                                                                      | <i>Macaca fascicularis</i> | Crab-eating macaque | M      | 6 years, 35 days   | 5.19        | Unvaccinated  | Positive   | ENVIGO | SNPRC      |
| MF17                                                                                      | <i>Macaca fascicularis</i> | Crab-eating macaque | M      | 5 years, 248 days  | 7.84        | BCG           | Negative   | ENVIGO | SNPRC      |
| MF18                                                                                      | <i>Macaca fascicularis</i> | Crab-eating macaque | M      | 5 years, 354 days  | 4.99        | $\Delta$ sigH | Positive   | ENVIGO | SNPRC      |
| MF19                                                                                      | <i>Macaca fascicularis</i> | Crab-eating macaque | M      | 6 years, 44 days   | 7.02        | Unvaccinated  | Negative   | ENVIGO | SNPRC      |
| MF20                                                                                      | <i>Macaca fascicularis</i> | Crab-eating macaque | M      | 6 years, 43 days   | 5.94        | $\Delta$ sigH | Positive   | ENVIGO | SNPRC      |
| MF21                                                                                      | <i>Macaca fascicularis</i> | Crab-eating macaque | M      | 6 years, 11 days   | 6.45        | Unvaccinated  | Positive   | ENVIGO | SNPRC      |
| MF22                                                                                      | <i>Macaca fascicularis</i> | Crab-eating macaque | M      | 6 years, 18 days   | 7.01        | $\Delta$ sigH | Positive   | ENVIGO | SNPRC      |
| MF23                                                                                      | <i>Macaca fascicularis</i> | Crab-eating macaque | M      | 6 years, 44 days   | 5.65        | $\Delta$ sigH | Positive   | ENVIGO | SNPRC      |
| MF24                                                                                      | <i>Macaca fascicularis</i> | Crab-eating macaque | M      | 6 years, 32 days   | 8.63        | Unvaccinated  | Negative   | ENVIGO | SNPRC      |
| MF25                                                                                      | <i>Macaca fascicularis</i> | Crab-eating macaque | M      | 6 years, 20 days   | 5.13        | Unvaccinated  | Positive   | ENVIGO | SNPRC      |

**Supplementary Table 1: Demographics for individual animals used in the study.**

| Supplementary Table 2. Flow Cytometry panels |                  |           |     |                 |         |       |                    |       |       |       |                    |              |        |           |
|----------------------------------------------|------------------|-----------|-----|-----------------|---------|-------|--------------------|-------|-------|-------|--------------------|--------------|--------|-----------|
| Laser                                        | BLUE LASER 488nm |           |     | RED LASER 640nm |         |       | VIOLET LASER 405nm |       |       |       | YELLOW GREEN LASER | UV LASER 355 |        |           |
| T cell Panel 1                               |                  |           |     |                 |         |       |                    |       |       |       |                    |              |        |           |
| Fluorochrome                                 | FITC             | PCP-Cy5.5 | APC | AL700           | APC-H7  | BV421 | BV480              | BV605 |       |       | PE                 | PE-Cy7       | BUV395 | FVS440 UV |
| Marker                                       | CD69             | CD4       | CD8 | CD3             | CD20    | CD95  | Ki67               | CCR7  |       |       | CCR5               | CD28         | CD45   | LIVE/DEAD |
| Volume/Test (µL)                             | 20               | 10        | 5   | 5               | 5       | 5     | 5                  | 5     |       |       | 20                 | 5            | 5      |           |
| T cell Panel 2                               |                  |           |     |                 |         |       |                    |       |       |       |                    |              |        |           |
| Fluorochrome                                 | FITC             | PCP-Cy5.5 | APC | AL700           | APC-Cy7 | BV421 | BV480              |       | BV650 | BV711 | PE                 | PE-Cy7       | BUV395 | FVS440 UV |
| Marker                                       | CD69             | CD4       | CD8 | CD3             | HLA-DR  | PD-1  | CCR7               |       | CCR5  | CCR6  | LAG-3              | CXCR3        | CD45   | LIVE/DEAD |
| Volume/Test (µL)                             | 20               | 10        | 5   | 5               | 2       | 5     | 5                  |       | 5     | 5     | 10                 | 5            | 5      |           |
| T cell Effector Panel                        |                  |           |     |                 |         |       |                    |       |       |       |                    |              |        |           |
| Fluorochrome                                 | eFluor520        | PCP-Cy5.5 | APC | AL700           | APC-Cy7 | BV421 |                    | BV605 | BV650 |       | PE                 | PE-Cy7       | BUV395 | BUV737    |
| Marker                                       | LIVE/DEAD        | CD4       | CD8 | CD3             | IFN-γ   | CD95  |                    | IL-17 | TNF-α |       | GrB                | CD28         | CD45   | IL-2      |
| Volume/Test (µL)                             |                  | 10        | 5   | 5               | 5       | 5     | 5                  | 5     | 5     |       | 5                  | 5            | 5      | 5         |

**Supplementary Table 2: Flow Cytometry panels.**

| Supplementary Table 3. List of antibodies. |                            |              |                    |                                                                                                                                          |                                |
|--------------------------------------------|----------------------------|--------------|--------------------|------------------------------------------------------------------------------------------------------------------------------------------|--------------------------------|
| Antibody                                   | Supplier                   | Clone        | Cat Number         | Validation Statement: Reactivity                                                                                                         | Dilution                       |
| CD69 (FITC)                                | BD Bioscience              | FN50         | 555530             | Human (QC Testing) Rhesus, Cynomolgus, Baboon (Tested in Development)                                                                    | As recommended by Manufacturer |
| CD4 (PCP-Cy5.5)                            | BD Bioscience              | L200         | 552838             | Rhesus, Cynomolgus, Baboon (QC Testing) Human (Tested in Development)                                                                    | As recommended by Manufacturer |
| CD8 (APC)                                  | Biologend                  | RPA-T8       | 301049             | Chimpanzee, Baboon, Cynomolgus, Rhesus, Pigtailed Macaque, Sooty Mangabey                                                                | As recommended by Manufacturer |
| CD3 (AL700)                                | BD Bioscience              | SP34-2       | 557917             | Rhesus, Cynomolgus, Baboon (QC Testing) Human (Tested in Development)                                                                    | As recommended by Manufacturer |
| CD20 (APC-H7)                              | BD Bioscience              | 2H7          | 560853             | Rhesus, Cynomolgus, Baboon (QC Testing) Human (Tested in Development)                                                                    | As recommended by Manufacturer |
| CD95 (BV421)                               | BD Bioscience              | DX2          | 562616             | Human (QC Testing) Rhesus, Cynomolgus, Baboon (Tested in Development)                                                                    | As recommended by Manufacturer |
| Ki67 (AF 488)                              | BD Bioscience              | B56          | 558616             | Human (QC Testing) Mouse (Tested in Development) Rat, Rhesus (Reported)                                                                  | As recommended by Manufacturer |
| CCR7 (BV605)                               | BD Bioscience              | 3D12         | 563711             | Human (QC Testing) , Rhesus (NHP Reagent Resource)                                                                                       | As recommended by Manufacturer |
| CCR5 (PE)                                  | BD Bioscience              | 3A9          | 556042             | Human (QC Testing) Rhesus, Cynomolgus (Tested in Development)                                                                            | As recommended by Manufacturer |
| CD28 (PE-Cy7)                              | BD Bioscience              | CD28.2       | 560684             | Human (QC Testing), Rhesus (NHP Reagent Resource)                                                                                        | As recommended by Manufacturer |
| CD45 (BUV395)                              | BD Bioscience              | D058-1283    | 564099             | Rhesus, Cynomolgus, Baboon (QC Testing)                                                                                                  | As recommended by Manufacturer |
| HLA-DR (APC-Cy7)                           | BD Bioscience              | L243         | 335796             | Human (QC Testing), Rhesus (NHP Reagent Resource)                                                                                        | As recommended by Manufacturer |
| PD-1 (BV421)                               | Biologend                  | EH12.2H7     | 329920             | Human, African Green, Baboon, Chimpanzee, Common Marmoset, Cynomolgus, Rhesus, Squirrel Monkey                                           | As recommended by Manufacturer |
| CCR7 (BV480)                               | BD Bioscience              | 3D12         | 566099             | Human (QC Testing), Rhesus (NHP Reagent Resource)                                                                                        | As recommended by Manufacturer |
| CCR5 (BV650)                               | BD Bioscience              | 3A9          | 564999             | Human (QC Testing) Rhesus, Cynomolgus (Tested in Development)                                                                            | As recommended by Manufacturer |
| CCR6 (BV711)                               | BD Bioscience              | 11A9         | 563923             | Human (QC Testing) Rhesus, Cynomolgus, Baboon (Tested in Development)                                                                    | As recommended by Manufacturer |
| LAG-3 (PE)                                 | R&D Systems                |              | FAB2319P           | Human, Rhesus (Validated in lab, Reported)                                                                                               | As recommended by Manufacturer |
| CXCR3 (PE-Cy7)                             | BD Bioscience              | 1C6          | 560831             | Human (QC Testing) Rhesus, Cynomolgus, Baboon (Tested in Development)                                                                    | As recommended by Manufacturer |
| CD103 (FITC)                               | ThermoFisher               | B-Ly7        | 11-1038-42         | Human, Rhesus (NHP Reagent Resource)                                                                                                     | As recommended by Manufacturer |
| CD123 (PerCP-Cy5.5)                        | BD Bioscience              | 7G3          | 562391             | Human (QC Testing) , Rhesus (NHP Reagent Resource)                                                                                       | As recommended by Manufacturer |
| CD14 (APC)                                 | BD Bioscience              | M5E2         | 561383             | Rhesus, Cynomolgus, Baboon (QC Testing)                                                                                                  | As recommended by Manufacturer |
| CD20 (AF700)                               | BD Bioscience              | 2H7          | 560631             | Human (QC Testing) Rhesus, Cynomolgus, Baboon (Tested in Development)                                                                    | As recommended by Manufacturer |
| CD206 (BV421)                              | BD Bioscience              | 19.2         | 564062             | Human (QC Testing) , Rhesus (NHP Reagent Resource)                                                                                       | As recommended by Manufacturer |
| CD16 (BV480)                               | BD Bioscience              | 3G8          | 566108             | Human (QC Testing) Rhesus, Cynomolgus, Baboon (Tested in Development)                                                                    | As recommended by Manufacturer |
| CD11c (BV711)                              | Biologend                  | 3.9          | 301630             | Human, African Green, Baboon, Chimpanzee, Cynomolgus, Rhesus, Squirrel Monkey                                                            | As recommended by Manufacturer |
| CD183 (PE)                                 | BD Bioscience              | GHI/61       | 556018             | Human (QC Testing), Rhesus (NHP Reagent Resource)                                                                                        | As recommended by Manufacturer |
| CD40 (PE-Cy7)                              | BD Bioscience              | 5C3          | 561215             | Human (QC Testing) Rhesus, Cynomolgus, Baboon (Tested in Development)                                                                    | As recommended by Manufacturer |
| IFN-γ (APC-Cy7)                            | Biologend                  | B27          | 506524             | Chimpanzee, Baboon, Cynomolgus, Rhesus, Pigtailed Macaque, African Green, Sooty Mangabey                                                 | As recommended by Manufacturer |
| IL-17 (BV605)                              | Biologend                  | BL168        | 512326             | Human, Rhesus (Validated in lab, Reported)                                                                                               | As recommended by Manufacturer |
| TNF-α (BV650)                              | Biologend                  | MAB11        | 502938             | Human, Cat (Feline) 11 Cross-Reactivity: Chimpanzee, Baboon, Cynomolgus, Rhesus, Pigtailed Macaque, Sooty Mangabey, Swine (Pig, Porcine) | As recommended by Manufacturer |
| GrB (PE)                                   | BD Bioscience              | GB11         | 561142             | Human (QC Testing), Rhesus (NHP Reagent Resource)                                                                                        | As recommended by Manufacturer |
| IL-2 (BUV737)                              | BD Bioscience              | MQ1-17H12    | 612836             | Human (QC Testing) Rhesus, Cynomolgus, Baboon (Tested in Development)                                                                    | As recommended by Manufacturer |
| HLA-A                                      | Akoya Biosciences          | EP1395Y      | Custom-Conjugation | Cynomolgus (QC Testing)                                                                                                                  | 1:300                          |
| HLA-DR                                     | Akoya Biosciences          | EPR3692      | Custom-Conjugation | Cynomolgus (QC Testing)                                                                                                                  | 1:100                          |
| CD20                                       | Akoya Biosciences          | L26          | Custom-Conjugation | Cynomolgus (QC Testing)                                                                                                                  | 1:200                          |
| CD21                                       | Akoya Biosciences          | EP3093       | Custom-Conjugation | Cynomolgus (QC Testing)                                                                                                                  | 1:400                          |
| CD68                                       | Akoya Biosciences          | KP1          | Custom-Conjugation | Cynomolgus (QC Testing)                                                                                                                  | 1:200                          |
| NG2a                                       | Akoya Biosciences          | EPR23737-127 | Custom-Conjugation | Cynomolgus (QC Testing)                                                                                                                  | 1:50                           |
| CD8                                        | Akoya Biosciences          | C8/144B      | Custom-Conjugation | Cynomolgus (QC Testing)                                                                                                                  | 1:200                          |
| CD4                                        | Akoya Biosciences          | EPR6855      | Custom-Conjugation | Cynomolgus (QC Testing)                                                                                                                  | 1:200                          |
| CD31                                       | Akoya Biosciences          | EP3095       | Custom-Conjugation | Cynomolgus (QC Testing)                                                                                                                  | 1:100                          |
| IDO1                                       | Akoya Biosciences          | V1NC3IDO     | Custom-Conjugation | Cynomolgus (QC Testing)                                                                                                                  | 1:100                          |
| Vimentin                                   | Akoya Biosciences          | O91D3        | Custom-Conjugation | Cynomolgus (QC Testing)                                                                                                                  | 1:400                          |
| GranzymeB                                  | Akoya Biosciences          | D6E9W        | Custom-Conjugation | Cynomolgus (QC Testing)                                                                                                                  | 1:100                          |
| CD3e                                       | Akoya Biosciences          | EP449E       | Custom-Conjugation | Cynomolgus (QC Testing)                                                                                                                  | 1:200                          |
| SMA                                        | Akoya Biosciences          | 1A4          | Custom-Conjugation | Cynomolgus (QC Testing)                                                                                                                  | 1:400                          |
| PAX5                                       | Akoya Biosciences          | D7H5X        | Custom-Conjugation | Cynomolgus (QC Testing)                                                                                                                  | 1:50                           |
| Foxp3                                      | Akoya Biosciences          | SP97         | Custom-Conjugation | Cynomolgus (QC Testing)                                                                                                                  | 1:100                          |
| CD79a                                      | Akoya Biosciences          | D1X5C        | Custom-Conjugation | Cynomolgus (QC Testing)                                                                                                                  | 1:50                           |
| CD19                                       | Akoya Biosciences          | RM332        | Custom-Conjugation | Cynomolgus (QC Testing)                                                                                                                  | 1:50                           |
| CD163                                      | Akoya Biosciences          | D6U1J        | Custom-Conjugation | Cynomolgus (QC Testing)                                                                                                                  | 1:50                           |
| CD206                                      | Akoya Biosciences          | EPR22489-7   | Custom-Conjugation | Cynomolgus (QC Testing)                                                                                                                  | 1:50                           |
| Podoplanin                                 | Akoya Biosciences          | NC-08        | Custom-Conjugation | Cynomolgus (QC Testing)                                                                                                                  | 1:200                          |
| CD278 (ICOS)                               | Akoya Biosciences          | D1K2T        | Custom-Conjugation | Cynomolgus (QC Testing)                                                                                                                  | 1:50                           |
| E-cadherin                                 | Akoya Biosciences          | 4A2C7        | Custom-Conjugation | Cynomolgus (QC Testing)                                                                                                                  | 1:100                          |
| CollagenIV                                 | Akoya Biosciences          | EPR209660    | Custom-Conjugation | Cynomolgus (QC Testing)                                                                                                                  | 1:200                          |
| Pan-Cytokeratin                            | Akoya Biosciences          | AE1/AE3      | Custom-Conjugation | Cynomolgus (QC Testing)                                                                                                                  | 1:300                          |
| Ki67                                       | Akoya Biosciences          | B56          | Custom-Conjugation | Cynomolgus (QC Testing)                                                                                                                  | 1:300                          |
| CD45                                       | Akoya Biosciences          | D9M81        | Custom-Conjugation | Cynomolgus (QC Testing)                                                                                                                  | 1:100                          |
| CD28                                       | Akoya Biosciences          | EPR22076     | Custom-Conjugation | Cynomolgus (QC Testing)                                                                                                                  | 1:50                           |
| CCR2                                       | Akoya Biosciences          | D14H7        | Custom-Conjugation | Cynomolgus (QC Testing)                                                                                                                  | 1:50                           |
| LC3                                        | Cell Signalling Technology | Polyclonal   | 2775s              | Human, Mouse, Rat (QC Testing)                                                                                                           | 1:100                          |

**Supplementary Table 3: List of antibodies.**

| Supplementary Table 4. Sequences of oligonucleotides. |               |                        |                         |
|-------------------------------------------------------|---------------|------------------------|-------------------------|
| Gene                                                  | Supplier      | Forward Primer 5'→ 3'  | Reverse Primer 5'→ 3'   |
| ATG5                                                  | Sigma Aldrich | TTTGCATCACCTCTGCTTTC   | TAGGCCAAAGGTTTCAGCTT    |
| ATG7                                                  | Sigma Aldrich | CGTTGCCCACAGCATCATCTTC | CACTGAGGTTCAACATCCTTGG  |
| b-Actin                                               | Sigma Aldrich | CATGTACGTTGCTATCCAGGC  | CTCCTTAATGTCACGCACGAT   |
| GAPDH                                                 | Sigma Aldrich | GGAGCGAGATCCCTCCAAAAT  | GGCTGTTGTCATACTTCTCATGG |
| GBP1                                                  | Sigma Aldrich | GTGGAACGTGTGAAAGCTGA   | CAACTGGACCCTGTCGTTCT    |
| GBP2                                                  | Sigma Aldrich | GATTTCACCCTGGAAGTGA    | GGGTTCAAGCTCTTCCTCCTT   |

**Supplementary Table 4: Sequences of oligonucleotides.**
