# Supplementary material for: Prevention of tuberculosis in cynomolgus macaques by an attenuated Mycobacterium tuberculosis vaccine candidate
Source: Springer Nature journal article supplement (doi:10.1038/s41467-025-57090-4), 2025-02-25
Supplement: MOESM3 [file 41467_2025_57090_MOESM3_ESM.pdf › 41467_2025_57090_MOESM3_ESM.pdf]

### **Description of Additional Supplementary Files**

**Supplementary Data 1:** List of significantly perturbed genes across lymphoid clusters. Markers for each cluster were identified using one-way Wilcoxon rank sum test and p-values were adjusted based using Bonferroni correction. No rounding operators were applied. Exact p-values and adjusted p-values are provided.
