# Supplementary material for: Prevention of tuberculosis in cynomolgus macaques by an attenuated Mycobacterium tuberculosis vaccine candidate
Source: Springer Nature journal article supplement (doi:10.1038/s41467-025-57090-4), 2025-02-25
Supplement: MOESM6 [file 41467_2025_57090_MOESM6_ESM.xlsx]

## Sheet: Figure 1
Figure
1b	A/G ratio
	Unvaccinated	BCG	∆sigH
	0	42.8571	5.88235
	-11.7647	33.3333	-7.69231
	-15.7895	6.25	14.2857
	6.25	-46.15	15.3846
	-12.5	43.75	66.6667
	-66.6667	-9.09091	9.09091
	-41.6667	-18.1818	7.14286
	-60		27.2727
	-15.38		-7.14286
1c	N/L ratio
	Unvaccinated	BCG	∆sigH
	0.928571	0.378378	1.97143
	1.96429	0.435897	0.742857
	1.72222	0.4375	0.4
	1.45614	1.30435	1.36667
	2.41176	1	2.1
	2.11111	0.43342	1.12202
	3.87654	1.28205	0.672316
	2.20228		1.2459
	5.01099		4.54286
1d	Arbitrary CXR score
	Unvaccinated	BCG	∆sigH
	3	0	0
	2	1	0
	4	0	0
	2	0	0
	0	2	0
	3	0	1
	1	1	0
	1		0
	2		0
1e	Log10 CFU/mL (BAL)
	Weeks post-infection	Unvaccinated									BCG							∆sigH
	3	3.0525	2.91698	2.96661	3.01115	3.23892	3.22102	3.24017	3.13862	2.72099	2.51488	2.67761	2.79657	2.82995	2.67761	2.5422	2.75089	0	0	0	0	0	0.352183	1.20412	1.70757	2.02015
	5	3.16909	3.00043	3.14644	3.07954	2.84572	3.26564	2.97417	3.05442	3.30984	2.57519	2.44091	3.01115	2.87564	2.6045	2.81441	2.80003	0	0	0	0	0	0	0.352183	0	1.69679
	7	0	0	2.17898	2.00432	2.17898	3.11511	2.95109	2.702	2.39314	2.44091	1.88081	2.72099	2.72099	2.69984	3.2307	2.44091	0	0	0	0	0	0	0	0	1.34733
1f	Log10 CFU/gram (Lung)
	Unvaccinated	BCG	∆sigH
	4.32421	3.78182	0
	4.39897	3.93184	0
	4.40552	3.64843	0.764056
	4.4449	0.761257	0.369193
	4.34933	1.03071	0.40095
	3.99508	3.18579	0
	4.06688	2.83473	0
	3.80395		0.432016
	4.42655		2.42239
1g	Log10 CFU/granuloma
	Unvaccinated	BCG	∆sigH
	3.32222	3.81291	0
	3.0607	3.25527	0
	2.54407	3.50515	0
	3.90309	3.8451	0
	3.65321	4.04139	0
	3.95424	3.04139	0
	2.77815	3.62325	0
	3.37107	4.39794	0
	3.65321	4.34242	0
	3.74819	3.77815	0
	4.81291	2.97772	0
	4.34242	3.04139	0
	3.09691	3.32889	2.25527
	3.87506	2.84973	1.43933
	3.81291	2.26717	1.17609
	3.61278	2.92942	1.47712
	3.50515	0	2.39358
	3.63347	0	1.54407
	3.34242	2.69241	0
	3.63347	2.54716	0
	3.35218	2.55931	0
	2.74036	0	0
	3.81291	0	0
	3.07918	0	0
	3.38917	2.47712	0
	2.47712	3.50515	0
	3.82607	2.90309	0
	2.50515	3.04139	0
	3.04139	3.36173	0
	4.32222	2.95424	0
	2.17609	0	0
	3.24304	2.09691	0
	3.51188	1.87506	0
	3.65321	1.79588	0
	3.8451	2.30103	0
	2.87506	0	0
	3.20784	0	0
	3.51188	0	0
	2.89418	0	0
	2.81954	0	0
	3.30103	0	0
	4.17609	0	0
	3.08009		0
	3.5443		0
	2.74036		0
	2.05356		0
	2.6322		0
	3.14613		0
	0		0
	1.87506		0
	2.8451		0
	2.79588		0
	2.65321		0
	3.77159		0
1h	Log10 CFU/gram (Bronchial Lymph Nodes)
	Unvaccinated	BCG	∆sigH
	5.50816	0	0
	5.07343	0	0
	5.08552	0	0
	5.4523	0	0
	6.30103	0	0
	4.84787	4.28456	0
	5.14419	4.28872	0
	5.30069		0
	5.42594		0
1r	% Lung Pathology
	Unvaccinated	BCG	∆sigH
	15.506	3.44271	3.36916
	27.4563	0.94697	3.64089
	31.5169	0.459559	0.950527
	26.8667	0.906883	1.9295
	18.5239	1.49549	0.679389
	11.3948	0.682648	1.12305
	11.0566	1.27013	1.83408
	10.0627		1.02636
	15.1114		0.032552
1s	% cellular inflammation
	Unvaccinated	BCG	∆sigH
	12.3114	3.22194	2.88587
	4.17399	1.98084	4.15268
	8.11136	3.04797	1.765
	4.30321	1.69443	4.84564
	21.3669	3.23305	0.196415
	5.24766	1.20628	5.69509
	2.16003	4.47533	0.245907
	5.62763	1.79541	0.292169
	2.65291	0.216242	0.114157
	1.6803	4.46157	3.30885
	2.71695	2.27744	0.444868
	1.7782	0.592479	0.224656
	1.59463	9.6399	2.24962
	2.2239	2.48663	0.520125
	2.77378	2.84658	0.189619
	2.72533	0.135439	0.652757
	1.7752	0.204435	2.13468
	1.15765	0.165232	0.04549
	20.991	2.6697	2.12062
	27.0714	1.96373	5.04452
	31.2968	1.99498	5.91892
	21.5196	2.68261	2.46202
	9.69924	5.95121	2.01577
	17.5988	0.373497	0.300913
	12.4277	0.791762	1.17541
	9.97582	0.481703	1.37975
	21.3225	0.061254	0.033899
	17.2831	1.19948	2.70284
	8.96037	1.50483	0.886989
	12.8355	2.31933	0.907623
	20.5478	0.518802	1.34561
	13.8557	0.01217	1.78456
	6.10445	0.860294	0.022825
	2.27646	1.52951	0.352775
	1.556	0.705418	0.791882
	5.43592	0.865184	4.22719
	1.64314	3.75764	1.31053
	1.54862	0.107566	0.224816
	1.86721	0.049511	0.670132
	0.257487	0.927889	6.16485
	1.08727	1.72779	19.0635
	0.275099	1.64883	4.86993
	7.88982	0.468498	4.45549
	0.692932	0.09389	0.465826
	0.135981	0.502241	0.01709
	0.008288	0.109496	0.084284
	0.101866	0.061866	0.757294
	0.136516	0.089204	0.721151
	0.12959	0.025786	0.73552
	3.2133	1.05001	0.316891
	1.06665	51.2425	0.008226
	1.71002	8.03356	0.237058
	0.122889	1.20501	0.038738
	2.13641	4.36965	1.55089
	4.08583	3.07748	0.479351
	0.533179	3.63061	0.339074
	0.671237	0.008706	0.237101
	0.640415	0.462726	0.514438
	0.799696	0.039642	0.090487
	0.374695	0.530017	0.282419
	0.626588	0.033404	0.054748
	3.12677	0.085654	0.268656
	0.62832
	4.87997
	0.096484
	4.09644
	0.556253
	1.00445
	0.447786
	0.376225
	0.682913
1t	% necrotic area
	Unvaccinated	BCG	∆sigH
	9.75538	0.528334	1.14054
	1.04717	1.07515	0.051549
	4.04912	0.377131	0.004698
	1.52971	0.871761	1.79174
	6.51705	0.389277	0.2035
	1.47977	0.212995	2.53425
	2.04205	1.05168	0.550119
	2.33382	0.526433	0.104212
	0.585995	0.020316	0.144087
	2.49265	1.85813	2.7787
	3.66123	0.182764	0.348848
	1.97623	0.029497	0.113512
	0.156274	1.38608	2.07488
	0.162298	0.964017	0.2583
	2.68556	0.44751	0.248606
	3.20348	0.02745	0.435947
	0.241995	0.055223	2.54928
	0.047778	0.07201	0.000529
	9.76724	0.741499	0.144506
	13.1241	0.28612	1.0911
	20.7202	0.228302	0.737805
	15.1853	0.09299	0.258462
	4.2628	0.812133	0.157477
	9.89825	0.057853	0.003301
	3.23066	0.096204	0.046688
	5.3312	0.057609	0.167856
	11.0833	0.010394	0.007402
	4.49392	0.003862	0.020016
	5.05245	0.022212	0.054318
	8.09699	0.019431	0.03275
	10.1334	0.020729	0.037538
	7.48741	0.012447	0.018904
	1.80478	0.04537	0.01662
	0.076182	0.035261	0.013122
	0.378337	0.19126	1.16081
	1.05868	0.010353	0.03363
	0.525777	0.027556	0.012108
	1.27452	0.410802	0.012555
	0.673946	0.054544	0.941987
	0.008162	0.011205	14.4308
	0.029542	0.010208	1.04528
	0.000217	0.004954	0.092987
	0.498329	0.017186	0.230351
	0.044064	0.000421	0.011436
	0.006308	0.02681	0.125074
	0.013519	0.046661	0.043112
	0.019245	0.004129	0.025056
	0.048921	0.044402	0.004646
	0.04294	0.762397	0.012254
	0.085201	1.11306	0.003556
	0.029382	0.049303	0.003983
	0.05395	0.174786	0.046462
	0.008735	0.160012	1.38592
	0.027791	0.164683	0.080264
	0.568109	0.033129	0.007378
	0.02772	0.00492	0.006294
	0.11431	0.022404	0.005294
	0.019211	0.003075	0.002479
	0.362418	0.03489	0.008408
	0.007734	0.018127	0.00972
	0.001856		0.016577
	0.187107
	0.00738
	1.57348
	0.000378
	0.006448
	0.020304
	0.038155
	0.033723
	0.014897
	0.005574
1u	% lymphoid aggregates /iBALT/ GrALT
	Unvaccinated	BCG	∆sigH
	0.877584	10.974	12.7884
	8.32354	6.99372	50.2145
	3.01584	7.73434	13.8446
	3.05131	2.15751	3.24386
	2.91429	11.2766	68.3285
	1.26609	9.14039	7.41934
	6.89649	12.8659	66.4764
	7.03155	13.6161	15.6287
	11.5221	18.0577	6.05659
	0.288787	1.27297	14.7903
	5.31959	2.34706	58.5423
	12.9656	11.13	9.22805
	5.85992	0.107033	0.926964
	4.29036	1.20886	2.21684
	2.82335	3.74632	4.24483
	0.875677	2.51824	15.1255
	4.02533	6.05633	3.79312
	14.4902	3.41945	10.9375
	0.953674	9.59084	4.35966
	2.1425	0.448266	8.65301
	2.12158	0.881374	3.33073
	2.05128	3.23912	5.21654
	2.48435	5.53875	5.31852
	2.5444	0.330602	3.87142
	5.83178	2.05589	18.9048
	2.55397	10.9777	8.67773
	3.48486	9.53736	15.198
	4.71701	1.28339	20.553
	3.97726	8.78605	99.097
	4.08263	7.82831	9.72908
	2.80448	80.5064	17.789
	4.30185	1.84909	8.89998
	8.9198	2.86081	78.5869
	8.79211	4.67128	54.478
	9.06696	8.62888	14.8328
	4.53896	89.1781	6.33231
	7.16643	86.2408	98.1106
	7.57962	11.2807	6.96725
	11.7856	15.8899	61.3698
	73.9235	0.211663	6.91015
	7.88581	31.7621	6.54345
	24.079	15.1145	4.2109
	9.49163	11.6511	10.8024
	4.29518	12.7466	45.1957
	53.4527	21.9341	2.18715
	72.2781	37.7123	92.9223
	26.9911	76.2124	30.824
	0.574084	15.7769	5.60068
	32.5026	1.76655	27.1061
	15.7797	5.45676	3.97668
	3.90645	14.1232	68.6928
	5.10662	15.5894	71.4134
	33.5949	3.40739	69.6801
	4.73419	3.85632	37.2491
	3.13416	21.7683	6.30741
	4.85417	38.6662	5.07585
	1.07792	50.2575	1.55865
	5.03263	3.20985	19.6976
	0.159344	62.4506	31.159
	26.8065	9.43796	21.658
	7.62843		15.5769
	2.55008		66.1936
	10.8301		12.0778
	2.29101
	18.7091
	8.44151
	20.0583
	10.5787
	24.1277
	22.9523
	19.3766

## Sheet: Figure 2
Figure	Subset
		Weeks post-infection	BCG					∆sigH
2a	CD3+	Week 3	123137	154885	81005.2	104920	189500	317091	407456	291456	475239	476209
		Week 5	103077	168989	70845.8	129926	160697	260656	374726	388298	380313	410566
		Week 7	116642	182414	110834	155864	142281	275653	412125	199590	577676	402980
2b	CD3+ CD4+	Week 3	43221.1	38101.7	25516.7	40604.1	64808.9	138886	114088	81024.9	58454.4	109528
		Week 5	38757.1	33290.8	18915.8	35599.7	52387.1	98528	88435.4	69117	63892.5	75954.7
		Week 7	45957.1	39948.6	36907.8	51902.6	48090.9	103370	112922	54488.1	65855.1	75357.3
2c	CD3+ CD8+	Week 3	70065	100830	49251.2	55712.6	115026	152521	246104	178954	380666	339537
		Week 5	55455.6	96999.5	39248.6	78345.2	100275	181938	256313	276468	271543	297660
		Week 7	61004	82268.6	63286.3	84322.3	83945.6	175591	258814	118956	448277	278056
2d	CD20+	Week 3	2418.8	4354.28	1775.21	2467.74	12236.8	15165.9	21790.2	15671.5	12083.8	24043.8
		Week 5	1534.73	3804.37	1749.89	3836.33	3834.18	6375.24	12932.8	5319.15	8788.51	17049.2
		Week 7	2029.38	4548.16	2866.67	3845.96	2662.79	3872.61	5927.64	3712.31	8476.43	8724.21
2e	CD3+ CCR5+	Week 3	82.6	73.5	61.4	63.4	78.2	75.4	79.7	86.2	85.9	80.5
		Week 5	72.9	76.5	47.4	60.2	76.6	72.9	88.8	86.3	85.5	83.4
		Week 7	86.9	86.7	73.8	79	79.7	81	90.6	92.1	91	91
2f	CD4+ CCR5+	Week 3	78.6	61.8	60.6	61.8	68.6	74.5	76.4	78.4	71.8	68.4
		Week 5	68.3	63.4	37.5	44.9	64.7	69.2	89.7	76.9	79.3	72
		Week 7	85	79	77.8	77.9	69.8	78.3	89.6	88.8	84.1	85.6
2g	CD8+ CCR5+	Week 3	85.8	77.8	64.4	65.1	84.9	76	80.3	89.1	88.1	85.2
		Week 5	76.6	80.3	53.3	66.4	83.7	73.7	87.4	86.5	86.5	86.1
		Week 7	88.6	89.4	74.1	79.8	85	81.5	90	93.2	92.2	91.9
2h	CD20+ CCR5+	Week 3	21.2	20.8	19.8	13.9	8.09	9.88	16	6.33	9.33	15
		Week 5	14.4	10	10.7	9.26	7.42	15.7	28.5	19.9	20.2	19.8
		Week 7	27.1	20.6	29	21.9	17.3	19	37	30.8	25.7	37.6
2i	CD3+ CXCR3+	Week 3	87.4	82.5	88.7	90.8	91.8	89.3	78.6	85.9	86.9	93
		Week 5	86.8	87.6	87.6	78	91.9	90.3	90.2	93.4	92.7	96.1
		Week 7	94	93.2	96	90.6	88.7	94.7	94.1	92	94.4	97.1
2j	CD4+ CXCR3+	Week 3	92.6	73.7	81.2	92.4	85.9	89	88.1	89.2	82.5	90.1
		Week 5	93.3	80.9	75.3	74.3	86.2	90	95.6	94.3	94.4	94.3
		Week 7	96.3	89.1	96.6	93.7	82.5	94.1	96.4	93.9	94.3	96.3
2k	CD8+ CXCR3+	Week 3	88.6	86.8	93.3	92	96.2	91.7	77	86.7	89	95.9
		Week 5	85.8	89.6	89.6	82.7	87	93.4	95.7	93	91.9	96.9
		Week 7	93.5	94.4	91.3	90.1	93.2	94.2	92.3	96.6	94.3	97.4
2l	CD3+ CCR6+	Week 3	18.4	14	19.1	15.5	14.8	20.4	31.7	25.3	26.9	24.1
		Week 5	30.3	25.3	29.5	32.8	28.6	39.2	61	38	50.6	36.1
		Week 7	1.69	1.47	1.52	1.73	2.4	1.34	2.96	1.48	1.41	1.96
2m	CD4+ CCR6+	Week 3	19.4	22.7	28.9	16.6	25.5	27.7	25.2	33.1	31.8	23
		Week 5	28.3	33.8	37.9	34.4	35.3	50	61.1	50.4	58.1	46.3
		Week 7	1.52	0.99	0.56	1.46	1.98	0.85	3.16	1.35	2.01	2.95
2n	CD8+ CCR6+	Week 3	16.6	10.7	21.9	14.3	7.93	13.3	34.3	19.2	27.2	17.4
		Week 5	27.5	22.3	39.9	31.7	23.9	24.5	58.4	26.9	49.6	30.2
		Week 7	1.29	1.44	1.69	1.78	2.53	1.16	2.29	1.44	1.25	1.49
2o	CD4+ CXCR3+ CCR6+	Week 3	14.5	9.06	17.4	12	18.5	20.7	21	27.6	24.4	18.6
		Week 5	22.5	20.9	18	18.7	26.7	40.9	55	44.5	51.7	40.2
		Week 7	0.79	0.4	0.56	0.73	0.54	0.43	1.78	0.7	0.76	1.9
2p	CD8+ CXCR3+ CCR6+	Week 3	6.28	3.1	16.4	8.96	5.78	8.89	30.2	15.4	21.9	14.5
		Week 5	12.2	12.2	14.9	15.3	14.4	30.3	40.2	17.9	37.3	22.2
		Week 7	0.55	0.63	0.68	0.63	1.31	0.54	1.03	0.49	0.5	0.89
2q	CD4+ EFF	Week 3	0.99	2.91	2.95	0.84	2.72	0.47	2.12	0.72	0.88	1.08
		Week 5	2.06	3.43	1.27	1.16	2.86	0.35	2.06	2.69	1.45	1.51
		Week 7	2.26	2.78	4.78	1.98	2.44	0.76	2.32	1.01	0.82	2.56
2r	CD4+ MEM	Week 3	95.7	93.1	93.5	95.8	91.1	96.2	95.2	97.3	96.8	95.7
		Week 5	92.9	91.3	92.4	95.2	92.5	97.7	95.5	97.3	96.1	95.6
		Week 7	95.2	93.8	91.2	93.7	94.5	95.8	94.4	96.9	97.8	94.6
2s	CD4+ NAÏVE	Week 3	0.54	1.29	2.31	0.81	4.11	0.88	0.39	0.71	1.23	1.71
		Week 5	0.2	0.29	0.15	1.54	2.92	0.41	0.19	0	0.25	0.65
		Week 7	0	0.27	0.33	0.097	0.17	0.34	0.2	0.29	0.22	0.064
2t	CD4+ EFF CD69+	Week 3	70.9	72.4	39.8	51.7	75.6	77	86.8	79.7	80.4	76.7
		Week 5	27.5	45	28.2	38.5	44	76	89.6	80	63.3	58.8
		Week 7	69.1	73.8	67.2	48.8	65.9	54.5	83.2	62.2	46.7	60
2u	CD4+ EFF KI67+	Week 3	0.83	0.64	0	0	0	0	0	0	0	0
		Week 5	0	0	0	0	0	0	0	0	0	0
		Week 7	2.27	3.03	2.92	2.22	0	5	11.8	9.52	6.9	4.88
2v	CD4+ MEM CCR5+	Week 3	79.8	62.4	61.7	63	71.2	75.1	76.5	78.7	73.2	69.4
		Week 5	71.7	66.3	37.5	45.5	65.9	69.8	90	75	81.2	72.9
		Week 7	85.4	79.4	78.8	79.6	70.2	79.3	90.2	89.2	84.5	86.1
2w	CD8+ MEM CCR5+	Week 3	92	82.7	70.3	74.6	88.3	81.1	89.3	92.5	90	90.5
		Week 5	87.7	86.4	60.1	75	77	91.2	93.9	92.9	90.2	92.5
		Week 7	92.8	92.5	81.7	86	87	86.4	94	95.2	93.7	95.9
2x	CD4+ MEM CCR7+	Week 3	0.82	0.86	1.54	1.4	0.94	3.05	4.89	1.72	1.45	2.23
		Week 5	1.13	0.79	0.92	0.75	0.99	0.65	2.78	0	0.32	1.42
		Week 7	3.35	6.5	4.7	3.09	3.75	1.92	4.64	1.97	2.56	4.8
2y	CD8+ MEM CCR7+	Week 3	0.2	0.23	0.36	0.32	0.32	0.83	0.66	0.21	0.29	0.23
		Week 5	0.47	0.1	0.25	0.13	0.6	0.23	0.36	0	0.054	0.27
		Week 7	0.33	0.97	0.72	0.87	0.7	0.29	0.36	0.29	0.32	0.34
2z	CD4+ MEM KI67+	Week 3	0.15	0.18	0.14	0.15	0.087	0.85	0.59	0.47	0.19	0.4
		Week 5	0	0.029	0.077	0.07	0	0.11	0.2	0.14	0.078	0.13
		Week 7	2.39	2.91	2.8	2.4	2.17	4.12	4.51	3.27	3.42	3.75
2a'	CD8+ MEM KI67+	Week 3	0.12	0.095	0.052	0.11	0.077	3.31	1.19	0.45	0.19	0.67
		Week 5	0.11	0.082	0.16	0.067	0.14	0.088	0.25	2.38	0.057	0.12
		Week 7	4.86	3.33	3.67	2.96	3.51	3.74	3.14	3.05	2.05	1.98

## Sheet: Figure 3
Figure	Subset
		Weeks post-infection	BCG					∆sigH
3a	CW CD4+ IFNG+	Week 3	2.06	2.94	5.35	2.7	1.95	45.1	33.15	23.2	24.54	27.1
		Week 5	0.47	4.83	0.181	0.204	2.64	23.1	9.03	16.36	33.2	38
		Week 7	1.81	4.6	2.83	1.72	2.05	22.95	36.8	13.39	9.73	17.78
3b	CW CD4+ TNFA+	Week 3	1.29	3.05	4.92	2.64	2.04	45.9	28.09	23	23.98	23.71
		Week 5	4.1	7.09	0.623	1.52	4.22	32.73	10.59	20.88	36.08	41.86
		Week 7	2.42	3.79	2.68	1.64	1.4	29.3	39.04	15.4	11.88	17.14
3c	CW CD4+ IFNG+ TNFA+	Week 3	37.97	23.45	37.19	18.4	24.88	42.6	54.9	38.5	29.04	32
		Week 5	37.93	20.6	47.399	13.034	22.24	39.6	59.81	46.57	49.8	38.5
		Week 7	25.56	17.27	19.77	16.1	17.73	33.75	51.4	28.99	34.01	26.58
3d	CW CD4+ GRB+	Week 3	0.72	1.83	3.87	1.3	1.41	42.5	24.3	20.6	22	21.2
		Week 5	0.19	5.23	0.066	0.017	3.22	23.2	8.85	12.8	32.1	37.3
		Week 7	1.24	1.91	1.76	0.45	0.73	20	30.9	10	6.88	14
3e	CW CD4+ IL17+	Week 3	1.13	1.65	1.74	1.76	0.404	17.09	3.91	4.12	6.36	8.61
		Week 5	0.35	0.72	0.623	1.52	0.69	4.17	2.72	1.03	0.98	1.18
		Week 7	1.7	0.88	1.02	1.27	0.91	4.67	4.13	0.65	1.96	3.41
3f	CW CD8+ IFNG+	Week 3	2.03	3.65	4.82	7.22	1.91	10.23	13.27	8.52	11.72	7.4
		Week 5	5.17	5.31	4.5	3.33	1.179	7.89	18.46	24.33	14.29	17.42
		Week 7	1.55	2.08	0.9	2.15	1.08	14.18	13.64	3.04	2.75	6.86
3g	CW CD8+ TNFA+	Week 3	1.23	4.03	3.37	7.55	1.55	7.2	16.62	7.87	15.68	4.82
		Week 5	16.77	8.54	9.81	7.72	1.65	10.27	23.16	36.96	31.79	35.22
		Week 7	1.35	1.647	0.67	2.79	0.98	15.72	14.64	4.19	3.39	7.29
3h	CW CD8+ IFNG+ TNFA+	Week 3	0.34	1.74	0.74	2.04	0.66	4.1	8.94	4.59	5.36	2.73
		Week 5	2.61	2.79	3.29	1.78	0.39	4.91	12.6	13.5	8.49	9.51
		Week 7	0.32	0.89	0.36	0.85	0.25	13	9.96	2.16	1.35	4.26
3i	CW CD8+ GRB+	Week 3	77.07	62.35	61.49	54.1	65.78	84.6	87.3	66.5	29.64	64.1
		Week 5	69.93	58.5	60.599	39.834	75.64	79	56.61	58.17	56.3	64.2
		Week 7	74.26	55.47	43.57	42.6	62.13	71.35	83.9	57.89	34.81	52.48
3j	CW CD8+ IL17+	Week 3	4.72	1.18	1.01	3.36	0.76	1.31	7.6	1.68	1.73	0.99
		Week 5	7.7	0.98	1.3	1.57	0.48	1.74	8.11	4.62	4.12	1.44
		Week 7	1.59	0.557	0.38	2.39	0.9	1.74	3.66	0.7	1.56	1.19
3k	EC CD4+ IFNG+	Week 3	1.24	1.95	4.04	4.25	2.01	10.55	12.41	5.14	2.62	14.99
		Week 5	0.25	0.094	0.04	0.168	0.103	3.85	23.9	3.93	1.59	6.56
		Week 7	2.25	6.98	1.23	1.81	2.84	2.35	12.28	1.21	1.71	2.8
3l	EC CD4+ TNFA+	Week 3	0.88	1.25	0.82	0.66	0.72	0.85	4.02	0.71	0.59	11.96
		Week 5	4.98	1.54	1.7	2.45	0.946	3.68	30.91	4.48	3.38	7.9
		Week 7	0.83	0.94	0.327	0.68	0.42	0.874	10.39	1.5	1.24	2.99
3m	EC CD4+ IFNG+ TNFA+	Week 3	31.36	19.74	30.68	17.21	25.79	21.6	44.55	24.1	18.84	23.15
		Week 5	18.91	13	36.84	8.604	13.277	21.15	48.8	37.9	24.81	26.9
		Week 7	22.13	8.71	13.74	11.71	12.77	19.66	46.74	21.55	18.48	20.45
3n	EC CD4+ GRB+	Week 3	0.19	0.14	0.32	0.14	0.3	0.31	2.57	0.12	0.19	11.3
		Week 5	0.18	0.031	0.081	0.056	0.026	1.16	20.9	1.27	1.38	5.47
		Week 7	0.2	0.14	0.14	0.18	0.079	0.24	7.31	0.56	0.42	0.85
3o	EC CD4+ IL17+	Week 3	1.12	0.5	0.425	0.43	0.54	0.57	1.64	0.28	1.19	5.65
		Week 5	0.362	0.29	0.44	0.8	0.256	0.57	2.43	0.46	0.41	0.49
		Week 7	1.82	1.03	0.897	0.86	1.17	0.984	1.94	0.78	1.34	1.61
3p	EC CD8+ IFNG+	Week 3	1.11	2.29	3.62	5.59	1.61	9.5	6.3	2.17	7.23	1.86
		Week 5	1.63	3.78	3.4	1.46	1.45	4.43	12.31	9.14	4.13	5.37
		Week 7	1.82	2.61	1.22	2.05	1.95	2.29	7.58	1.14	2.12	5.55
3q	EC CD8+ TNFA+	Week 3	0.99	2.8	1.68	3.74	1.38	3.91	5.33	1.93	14.08	1.67
		Week 5	2.37	6.56	6.66	3.38	0.552	6.04	7.46	10.43	7.93	4.9
		Week 7	1.02	0.154	0.438	1.21	0.38	1.36	6.53	1.54	1.86	6.23
3r	EC CD8+ IFNG+ TNFA+	Week 3	0.22	1.27	0.93	1.17	0.43	1.58	2.27	2.5	4.09	2.52
		Week 5	0.26	0.24	0.17	0.046	0.047	2.04	2.33	2.5	1.87	1.35
		Week 7	0.46	0.017	0.083	0.18	0.1	0.65	3.25	1.6	1.16	2.87
3s	EC CD8+ GRB+	Week 3	69.66	59.54	51.68	49.01	65.59	54.3	65.45	48.7	17.34	47.65
		Week 5	67.11	54.8	50.44	37.084	64.877	63.45	70.8	66	40.81	55.2
		Week 7	71.23	46	38.54	40.81	55.97	62.56	76.74	48.05	22.88	44.65
3t	EC CD8+ IL17+	Week 3	2	0.6	0.732	1.93	0.82	0.7	4.18	0.24	1.57	0.46
		Week 5	0.92	0.89	1.023	0.85	0.117	0.77	2.67	1.57	1.02	0.42
		Week 7	1.26	0.514	0.278	1.11	0.82	1.14	2.9	0.57	1.4	1.61

## Sheet: Figure 4
Figure	Cluster
		BCG (Week 3 Post-vaccination)				∆sigH (Week 3 Post-vaccination)
Fig 4d	C0	0.257769	1.24507	0.133562	4.84874	2.61721	3.36209	4.67507	8.53546
Fig 4e	C1	0.0429615	0.160256	0	1.40903	5.05234	1.08383	4.50048	10.5721
Fig 4f	C2	0.272089	0.554734	0.152643	2.15499	5.57579	1.23866	2.73521	7.70228
Fig 4g	C3	0.329371	0.0369823	0.057241	0.0414422	4.5858	12.6299	0.155189	0.0185151
Fig 4h	C4	0.143205	2.34221	0.429307	0.145048	1.75239	0.586154	11.8332	0.425847
Fig 4i	C5	0	0	0	0.103605	7.40783	1.34926	0.756547	0.333272
Fig 4j	C6	0	0.0493097	0.0190803	0.269374	2.54893	1.2276	1.14452	0.851694
Fig 4k	C7	0.085923	0.0493097	0.00954016	0.103605	1.27447	0.298606	0.484966	1.07388
Fig 4l	C8	0	0.616371	0	0.227932	0.113792	0.0774165	0.310378	1.27754
Fig 4m	C9	0.0143205	0	0.00954016	0.103605	0.307237	0.22119	0.407371	0.425847

## Sheet: Figure 7
Figure
7a	Days post-infection	∆sigH			CDC1551
	0	4.60206	4.77815	4.596	4.74819	4.83885	4.89746
	3	5.07918	5.19313	5.10589	5.30103	5.41497	5.4776
	5	5.07918	5.12057	5.2097	5.4624	5.85733	5.72349
	7	4.27875	4.02119	4.10746	5.33846	5.35411	5.5632
7d	Days post-infection	Uninfected			CDC1551			∆sigH
	1	1	1	1	0.72397	0.920126	0.816176	2.74307	2.44489	2.58699
	3	1	1	1	0.714891	1.07714	1.21858	3.7906	3.71965	3.75476
	5	1	1	1	3.09059	4.56598	5.59323	6.27687	8.16161	7.69284
7e	Days post-infection	Uninfected			CDC1551			∆sigH
	1	1	1	1	0.809303	0.73777	1.01532	2.08484	2.7095	2.88787
	3	1	1	1	2.13981	3.77749	2.075	3.3457	4.2326	3.88216
	5	1	1	1	3.04952	2.21442	3.95103	6.42036	6.49175	6.91962
7f
	Days post-infection	Uninfected			CDC1551			∆sigH
	1	1	1	1	0.42353	0.689062	0.385067	8.09266	7.1099	9.4423
	3	1	1	1	8.29489	6.1692	4.04795	40.8537	34.1591	49.1965
	5	1	1	1	15.774	11.8751	17.9742	22.7886	28.9307	20.7703
7g	Days post-infection	Uninfected			CDC1551			∆sigH
	1	1	1	1	3.0796	3.34157	2.83741	4.06214	8.01018	5.70425
	3	1	1	1	4.28027	5.38317	6.33739	12.208	15.0424	18.0338
	5	1	1	1	6.59483	4.80407	7.13431	20.943	15.8089	18.8758
7i	Isotype	og-cdc1511	Isotype	og-∆sigH
	11	23	11	11
	11	44	15	65
	9	24	11	67
	8	54	2	78
	1	23	11	73
	2	21	13	45
	3	23	14	77
	21	43	12	23
	7	44	16	45
	7	45	17	78
	8	11	14	87
	9	23	12	89
	5	24	12	90
	11	27	4	85
	18	21	7	54
	12	20	8	56
	27	15	9	68
	21	31	16	76
	20	32	8	72
	9	44	9	56
	3	12	4	44
	5	14	1	65
	2	34	7	66
	6	48	5	78
	7	23	7	87
	11	27	8	91
	22	22	9	45
	11	35	1	44
	5	3	1	76
	8	5	11	45
	9	7	10	59
	11	56	11	22
	15	45	18	12
	13	41	12	18
	12	42	14	44
	4	34	12	34
	3	2	11	53
	4	19	4	43
	6	22	5	45
	4	29	8	7
	2	12	9	6
	3	4	8	56
	4	6	9	66
	11	7	11	67
	4	12	4	60
	7	16	12	90
	4	34	15	29
	11	38	21	22
	12	21	12	44
	15	22	5	46
7j	Hours post-infection	CDC1551			∆sigH
	48	1655.89	1432.91	1568.24	1562.98	1654.91	1509.98
	72	1650.59	1432.91	1566.24	2315.91	2190.98	2310.09
7k		CDC1551			∆sigH
	scr.bcln1	2277.96	2301.73	1903.98	2441.91	2773.9	2623.89
	sirna becn1	1552.91	1421.5	1798.98	1143.4	1209.91	1122.98

## Sheet: Figure 8
Figure	Subset
		Unvaccinated												BCG												∆sigH
8a	CD4+	35.1	32.2	30.1	46.7	48.6	47.1	18.7	36.9	27.4	0	0	6.9	56.6	33.3	25.3	32.5	27.1	29.8	27.3	26.1	27.6	27.8	31.8	30.7	45.2	51.8	46.8	56.8	60	53.9	42.9	54.9	51.8	52.6
8b	CD4+ NAÏVE	20.9	7.65	9.12	3.59	6.95	18.4	4.47	5.24	8.9	0	0	0	57.4	100	38.1	4.72	3.16	4.76	40.1	12.16	58.4	12.76	98.5	2.92	6.3	2.54	1.79	14.3	6.94	4.88	40.4	10.1	4.37	7.4
8c	CD4+ MEM	63	78	72.6	68	84.2	65.3	89.5	89.5	88.4	0	0	50	42.6	0	47.6	87.5	90.4	89	49.6	39.4	43.6	57	0	45.7	89	93.8	90.6	79.8	87.5	85.4	54.4	85.9	91.5	88.4
8d	CD4+ MEM CD69+	62.6	65.7	69.8	65.4	70.5	48.4	64.4	51.5	45.7	0	0	100	65	0	40	30.7	34.9	34.6	42	33.9	66	32.6	0	28.9	59.6	67.1	71.3	59.7	63.5	45.7	71	70.2	82.1	65.7
8e	CD4+ MEM KI67+	17.5	25.1	20.5	14.9	12.4	21.9	9.12	9.9	9.3	0	0	100	5	0	10	2.7	1	2.14	12	0	6	0.14	0	0.9	2.36	2.9	1.98	0.75	0	0	3.23	1.97	2.27	1.76
8f	CD4+ EFF CD69+	72.2	76.4	67.5	50.7	33.3	33.3	60	71.4	0	0	0	0	0	0	0	8.7	0	8.33	2	0	0	1.33	0	6.9	50	25	22.2	25	0	33.3	0	35.7	50	30.8
8g	CD4+ CD69+	52.8	63.4	64.5	60.8	67.1	36.7	61.3	49.6	42.5	0	0	50	29.8	33.3	23.8	28.8	32.9	32.7	25.8	31.9	30.8	30.7	31.8	27	58	66.6	68.6	51.2	59.7	43.9	59.6	65.1	80.2	63.4
8h	CD8+	45	48.3	48.2	34.5	36.4	36.5	54.7	49.1	56	12.5	0	0	39.8	44.4	51.8	53.8	60.5	53.7	53.8	59.5	40.8	51.7	42.9	52	37.5	33.8	34.5	33.4	32.5	30.3	44.4	31	34.4	34.4
8i	CD8+ NAÏVE	9.3	3.09	3.16	1.33	2.26	5.26	0.99	1.41	2.68	0	0	0	81.8	100	37.2	1.57	0.94	2.11	32.1	0	82.8	0.11	98.5	0	2.22	3.06	0	32.3	0	0	22	7.73	3.95	6.03
8j	CD8+ MEM	26.5	34	29.5	49.6	56.4	38.2	48.9	59	47.3	100	0	0	3.03	0	9.3	47	48.9	54.9	11.3	47.9	4.03	52.9	0	45.2	65.5	63.8	60.4	38.4	51.3	60.9	39	55.5	62	56.4
8k	CD8+ CD69+	70.5	80.2	74.5	77.4	79.4	64.5	62.8	59.8	54.4	0	0	0	6.06	0	18.6	45	51.9	57	20.6	42.9	9.06	25	0	23.2	71.2	78.8	73.2	43.4	59	65.2	54.2	64.7	74.8	66
8l	CD8+ MEM CD69+	78.1	83.2	70	76.8	80.8	62.1	76.1	66.3	65.2	0	0	0	0	0	75	53.9	56.9	64.6	77	55.9	0	62.6	0	52.1	78.3	84.7	81.8	71.1	80	78.6	82.6	73.9	81.7	76.5
8m	CD8+ MEM CCR5+	57	50.9	37.1	22.3	55.7	75.9	57.8	74	58.9	50	0	0	0	0	75	79.7	80.5	83.5	77	79.5	0	81.5	0	77.9	82.1	80.3	84.8	78.9	90	78.6	82.6	57.4	45.9	57
8n	CD8+ EFF CD69+	74.9	82.2	78.8	80.8	80.2	71.8	52.5	51.8	50.3	0	0	0	20	0	13	36	45	47.2	15	44	21	45.2	0	34.2	55.7	70.4	58.7	46.4	37.5	28.6	50	57.4	64.6	57.6
8o	CD20+	21.3	19.8	21.1	3.86	12.8	17.1	3.41	12.7	12.2	24.7	26	25	8.7	9.09	24.6	24.7	18.9	18.8	7.33	8.42	9.2	7.2	6.7	7.82	22.9	15.1	16.82	16.1	25.4	29	13.4	24.8	18.3	25.3
8p	CD20+ CD69+	32	44	22	20	62	44	27	31	25	53	64	56	0	0	2.94	30.6	31.6	26.1	22	24	0	0	4	19	37.3	40.9	41.6	28.8	30	29.4	36	15.5	23	38.2
8q	CD20+ CD69+	27	20.9	19.6	50	57.1	28.1	44.4	29.5	24.2	61	79.8	92.3	0	0	2.94	30.6	31.6	26.1	2.44	4.8	5.12	4.22	0	0	32.3	42.9	43.6	18.8	10	19.4	16	35.5	43	35.6
8r	CD20+ KI67+	57.4	59.1	49.4	71.9	60.7	57.9	37.8	38.6	28.6	57.1	67.3	93.3	0	0	0	11.1	5.12	7.98	0	1.22	0	0	2.1	0	5.61	14.6	7.69	6.25	6	8.33	4	4.16	5.99	8.45

## Sheet: Figure 9
Figure	module	cluster
			Unvaccinated	∆sigH
9k	Cytotoxic T cell module	Cytotoxic T	2.024	3.858
		Cytotoxic T - GZMB	1.877	3.392
		Cytotoxic T - ICOS	0.032	0.055
		Cytotoxic T - Proliferating	0.364	0.546
			Unvaccinated	∆sigH
9l	Helper T cell module	Helper T	3.513	5.167
		Helper T - GZMB	0.04	0.799
		Helper T - ICOS	0.18	0.16
		Helper T - Proliferating	0.113	0.672
		Tregs	0.264	0.626
		Ki67	0.172	0.343
			Unvaccinated	∆sigH
9m	B cell module	B cells	1.533	1.5
		B cells proliferating	0.07	0.183
		Lymphatics	0.841	1.383
